# Supplementary material for: Fewer temperature ties: scalable integration and broad selection of phase change materials for both heating and cooling
Source: Royal Society of Chemistry journal article supplement (doi:10.1039/d4ee04223a), 2025-01-01
Supplement: d4ee04223a1.pdf [file d4ee04223a1.pdf]

## Supplementary Information

for

### Fewer temperature ties: scalable integration and broad selection of phase change materials for both heating and cooling

Xiaoxue Kou <sup>1</sup>, Jiatong Jiang <sup>1</sup>, Baoshan Xie <sup>1</sup>, He Shan <sup>1</sup>, Primož Poredoš <sup>1,2</sup>, Ruzhu Wang <sup>1,\*</sup>

<sup>1</sup> Institute of Refrigeration and Cryogenics, MOE Engineering Research Center of Solar Power and Refrigeration, Shanghai Jiao Tong University, Shanghai 200240, China

<sup>2</sup> Laboratory for Sustainable Technologies in Buildings, Faculty of Mechanical Engineering, University of Ljubljana, Ljubljana, Slovenia

\*Corresponding author: rzwang@sjtu.edu.cn

#### Note 1. Heat pump model

To critically evaluate and optimize the system performance, a detailed heat pump model is developed under these fundamental assumptions:

- (1) The heat pump operates in a steady state;
- (2) Gravitational and kinetic energy are negligible, along with minor pressure drop in heat exchangers;
- (3) The refrigerant is assigned a superheat of 4.5°C in the evaporator and a subcooling of 2.5°C in the condenser.

The relationship between the supplied heat/cold thermal energy and the ambient can be determined once equilibrium occurs between the thermal energy provision power and the heat dissipation power amidst the enclosed space and its surrounding atmosphere. The details are shown in Fig. S1.

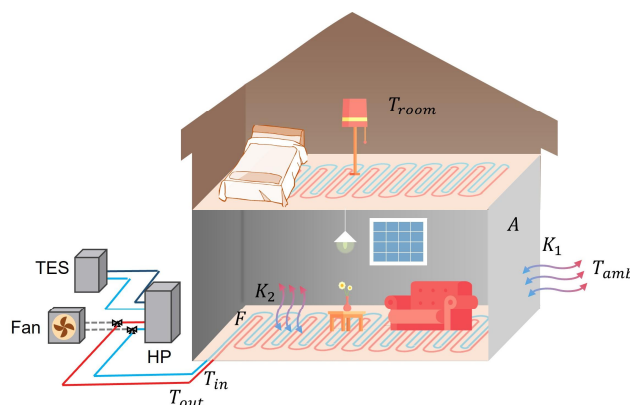

**Figure S1.** Thermal equilibrium model within a house

$$\dot{Q}_{hs} = AK_1(T_{room} - T_{amb,w}) = FK_2\left(\frac{T_{hs,in} + T_{hs,out}}{2} - T_{room}\right) \quad (1)$$

$$\dot{Q}_{cs} = AK_1(T_{amb,s} - T_{room}) = FK_2\left(T_{room} - \frac{T_{cs,in} + T_{cs,out}}{2}\right) \quad (2)$$

where, the left part represents the heat dissipation power and the right part is the thermal energy

supply power, symbolized by  $\dot{Q}_{hs}$  and  $\dot{Q}_{cs}$ .  $T_{amb,w}$  and  $T_{amb,s}$  denote the ambient temperatures in winter and summer.  $T_{hs,in}$  and  $T_{cs,in}$  are the heat and cold supply temperature, and correspondingly,  $T_{hs,out}$  and  $T_{cs,out}$  are the return temperature of heat and cold supply. The supply and return temperatures are set with a 20 °C differential.  $A$  is the surface area of the building's enclosed structure, and  $K_1$  refers to the heat transfer coefficient of the enclosed structure. The indoor temperature, designated as  $T_{room}$ , is assumed to be 22 °C.  $F$  is the heat transfer area of the indoor heat exchanger, and  $K_2$  represents the heat transfer coefficient.

R134a is opted for in this study due to its compatibility with the two-stage operation temperature range of heat pumps. The heat absorbed by the refrigerant in the evaporator  $q_{abs'}$  or  $q_{abs''}$  (1'→2' and 1''→2'') is:

$$q_{abs'(abs'')} = h_{2'(2'')} - h_{1'(1'')} \quad (3)$$

where  $h$  is the specific enthalpy of the refrigerant, and the superscript ' and '' represent the first and second stages of heat pump cycles.

The electrical input by the positive-displacement compressor  $p_{cmp'}$  or  $p_{cmp''}$  is:

$$p_{cmp'(cmp'')} = \frac{h(p_{3'(3'')}, s_{2'(2'')}) - h_{2'(2'')}}{\eta_{is}\eta_v\eta_{el}\eta_{me}} \quad (4)$$

where, the isentropic efficiency  $\eta_{is}$ , volumetric efficiency  $\eta_v$ , electricity efficiency  $\eta_{el}$ , mechanical efficiency  $\eta_{me}$  are maintained at 0.85, 0.85, 0.97, 0.98<sup>1</sup>, respectively.

The heat released by the refrigerant in the condenser  $q_{rel'}$  or  $q_{rel''}$  (3'→4' and 3''→4'') is:

$$q_{rel'(rel'')} = h_{3'(3'')} - h_{4'(4'')} \quad (5)$$

Within a heat pump cycle, the refrigerant mass flow rate is determined by the heat/cold thermal energy charging and discharging power and the thermal energy demands from users:

$$\dot{m}_{ref,h'} = \dot{m}_{ref,h''} \frac{q_{abs''}\tau_{discharge,h}}{q_{rel'}\tau_{charge,h}} \quad (6)$$

$$\dot{m}_{ref,h''} = \frac{\dot{Q}_{hs}}{q_{rel''}} \quad (7)$$

$$\dot{m}_{ref,c'} = \dot{m}_{ref,c''} \frac{q_{rel''}\tau_{discharge,c}}{q_{abs'}\tau_{charge,c}} \quad (8)$$

$$\dot{m}_{ref,c''} = \frac{\dot{Q}_{cs}}{q_{abs''}} \quad (9)$$

where  $\dot{m}_{ref,h'}$ ,  $\dot{m}_{ref,h''}$  are the refrigerant mass flow rates of the first and second heat pump cycles.  $\tau_{discharge}$  and  $\tau_{charge}$  denote the duration of the charging and discharging processes. The subscripts  $h$  and  $c$  stand for heating and cooling, respectively.

## Note 2. Heat pumps and intermediate PCMs coupling model

Regarding heat pumps and intermediate PCMs coupling model, the underlying assumptions are as follows:

- (1) Phase change materials maintain a continuous uniform temperature throughout their melting and solidifying processes;

(2) The model assumes no heat and temperature loss of thermal energy in storage stages;

The stored heat/cold thermal energy in the intermediate storage unit encompasses both latent and sensible parts.

$$Q_{str,h(c)} = m_{PCM,h(c)} \left( \int_{T_{min}}^{T_{pc}} c_{p,s} dT + h_{latent} + \int_{T_{pc}}^{T_{max}} c_{p,l} dT \right) \quad (10)$$

$$m_{PCM} = \max(m_{PCM,h}, m_{PCM,c}) \quad (11)$$

where,  $m_{PCM,h(c)}$  signifies the required mass of phase change materials to adequately deliver in-time heating or cooling power to end-users within a specified period  $\tau_{discharge}$ . The actual mass of phase change material contained within the storage unit  $m_{PCM}$  is the upper limit of the targeted phase change material mass, namely  $m_{PCM,h}$  and  $m_{PCM,c}$ .  $m_{PCM,h}$  and  $m_{PCM,c}$  retain their pivotal role in quantifying the stored thermal energy of charging and discharging operations related to heat and cold provision.  $T_{min}$  and  $T_{max}$  are assumed as  $T_{pc} - 2$  and  $T_{pc} + 2$  to ensure the latent heat is fully utilized.

A shell-and-tube heat exchanger facilitates the interaction between the refrigerant and phase change materials as depicted in Fig. S2. This simplified model represents the one-dimensional heat transfer among these substances. The refrigerant flows along the inner walls of the tubes, while phase change materials undergo a phase change process outside the tubes.

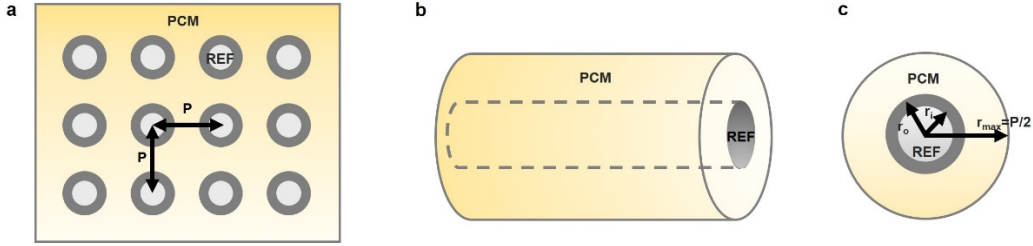

**Figure S2.** Physical model of shell-and-tube latent thermal energy storage unit. (a) 2D schematic diagram. (b) Simplified 1D model. (c) Parameters of simplified 1D model.

The heat transfer process in the steady state between phase change materials and the refrigerant is:

$$\dot{m}_{ref} \Delta h_{ref} = \frac{\Delta T}{R_{ex} + R_{ref} + R_{PCM}} \quad (12)$$

where,  $\dot{m}_{ref}$  is the mass flow rate of refrigerant, and  $\Delta h_{ref}$  is the specific enthalpy difference between refrigerant input and output. The heat transfer temperature difference between the refrigerant and phase change materials, designated as  $\Delta T$ , delineates the phase change temperature difference between the refrigerant and phase change materials. The denominator of the right-side term includes the thermal resistance of the heat exchanger tube  $R_{ex}$ , the refrigerant  $R_{ref}$ , and the phase change materials  $R_{PCM}$ <sup>2</sup>.

$$R_{ex} = \frac{\ln\left(\frac{r_o}{r_i}\right)}{2\pi k_{ex} L_{ex}} \quad (13)$$

where,  $r_o$ ,  $r_i$  and  $k_{ex}$  are the outer radius, inner radius, and thermal conductivity of the heat

exchanger tube, respectively. The length of one set of heat exchanger tubes, designated as  $L_{ex}$ , is calculated according to  $m_{PCM}$  and the number of sets of heat exchange tubes  $n_{set}$  ( $n_{set}$  varies between 4 and 6 to limit  $L_{ex} < L_{max}$ ).

To augment the heat transfer between phase change materials and heat transfer fluid, these materials are customarily constrained within a limited spatial region, accommodating compact fins or strategically inserting metal foams<sup>3</sup>. Consequently, the convection within phase change materials throughout the melting and solidification processes is negligible, permitting the heat transfer within phase change materials to be estimated by thermal conduction<sup>4,5</sup>. The thermal resistance of phase change materials can subsequently be estimated<sup>2</sup>, with the attributes of the applicable heat exchanger<sup>2,6</sup>.

$$R_{PCM} = \frac{\ln\left(\frac{(\delta(r_{max}^2 - r_o^2) + r_o^2)^{\frac{1}{2}}}{r_o}\right)}{2\pi L_{ex} k_{PCM,id}} \quad (14)$$

where,  $\delta$  is the fraction of phase change materials that has yet to change the phase during the phase change process. An average estimation of this value is conservatively set at 0.5.  $r_{max}$  refers to the maximum distance in which the phase change front from one tube meets the phase change front of another tube, which equals half of the pitch distance  $P$ <sup>2</sup>.  $k_{PCM,id}$  signifies the ideal thermal conductivity of PCMs.

$$R_{ref} = \frac{1}{h_0 A_{ex}} \quad (15)$$

where,  $A_{ex}$  is the heat transfer area of the refrigerant, and  $h_0$  denotes the average convective coefficient of the refrigerant in tubes.

While the occurrence of refrigerant boiling inside the tubes poses a more intricate process, it is noted that refrigerant forms stratified flow within horizontal tubes under scenarios of low mass flux ( $< 50 \text{ kg/m}^2 \cdot \text{s}$ ) and low heat flux ( $< 2 \text{ kW/m}^2$ )<sup>7</sup>. The Liu and Winterton correlation is invoked here to calculate the convective heat transfer coefficient  $h_0$  for in-tube evaporation, as delineated in eqn (16-20)<sup>8</sup>. For the estimation of in-tube condensation, the optimized expression employed is the Shah correlation (eqn (21)), which predicts the mean convective heat transfer coefficient associated with condensation across the range of vapor quality from 1 to 0<sup>9</sup>.

$$h_{evp} = ((E h_{cb})^2 + (S h_{nb})^2)^{0.5} \quad (16)$$

$$h_{cb} = 0.023 Re_l^{0.8} Pr_l^{0.4} \frac{k_l}{D_i} \quad (17)$$

$$h_{nb} = 55 p_r^{0.12} (-\log_{10}(p_r))^{-0.55} M^{-0.5} \frac{\dot{m}_{ref}^{0.67}}{\pi r_i^2} \quad (18)$$

$$E = \left(1 + x Pr_l \left(\frac{\rho_l}{\rho_v} - 1\right)\right)^{0.35} \quad (19)$$

$$S = \frac{1}{1 + 0.055 E^{0.1} Re_l^{0.16}} \quad (20)$$

where,  $p_r$  is contrast pressure;  $Pr_l$  is Prandtl number;  $Re_l$  is Reynolds number;  $M$  is the relative

molecular mass of the refrigerant.  $\dot{m}_{ref}$  is the mass flux, and  $x$  denotes vapor quality.  $\rho_l$  and  $\rho_v$  are the density of liquid and gaseous refrigerants.  $k_l$  is the thermal conductivity of liquid refrigerant, and  $D_i$  is the inner diameter of heat exchange tubes.

$$h_{cond} = h_L \left( 0.55 + \frac{2.09}{p_r^{0.38}} \right) \quad (21)$$

where,  $h_L$  is the convective heat transfer coefficient, assuming all the mass flow as liquid, and is calculated by the Dittus-Boelter equation.

### Note 3. Model validation

Validation of the heat pump model with the refrigerant of R134a is achieved through the experiment data acquired from our previous study on the single-stage operation of a scroll compressor heat pump <sup>10</sup>. Comprehensive operational details pertaining to this heat pump are provided in Table S1. A comparison between the simulation and experimental coefficient of performance (COP) can be found illustrated in Fig. S3. The model validity under varying operating conditions is ensured by examining the COP at varied evaporation and condensation temperatures,  $T_{evap}$  and  $T_{cond}$ . The COP prediction agrees well with experimental values, deviating by less than 5%. This confirms the suitability of the heat pump model for further study.

**Table S1.** Detailed information about the operation of the actual heat pump <sup>10</sup>

| Parameters                                     | Value                         |
|------------------------------------------------|-------------------------------|
| Refrigerant                                    | R134a                         |
| Displacement of the compressor                 | 60 cm <sup>3</sup> /rev       |
| Rated speed of the motor                       | 4500 rpm                      |
| Evaporator and Condenser                       | Shell and tube heat exchanger |
| Tube length/inside diameter of heat exchangers | 5750/19 mm                    |
| Number of tubes                                | 2                             |

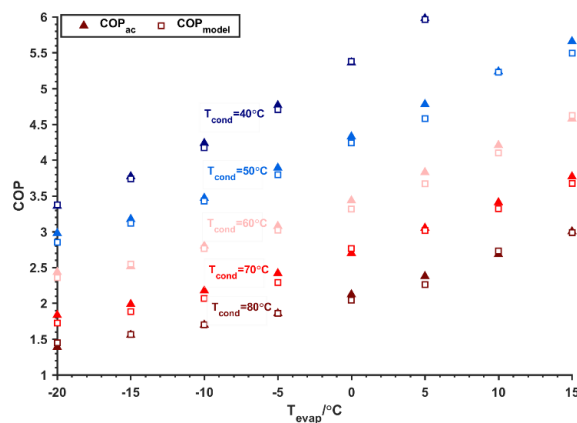

**Figure S3.** The comparison of the simulation and experimental results <sup>10</sup>

The comprehensive analysis and verification of the thermal resistance within the latent thermal energy storage unit, including phase change material and heat exchanger thermal resistance, is executed following our previous extensive experimental and simulation examination on a three-

dimensional latent thermal energy storage unit <sup>11,12</sup>. Figure S4 delineates the structural data of the 3D latent thermal energy storage unit. The precise thermal resistance is determined using the heat transfer power and temperature differential between the heat transfer medium water and the phase transition material PCM 90. The previously developed 3D numerical model effectively simulates the temperature fluctuations of phase change materials during charging and discharging. Consequently, the thermal resistance within the latent thermal energy storage unit derived from integrating the numerical model and experimental findings is compared with that derived via the simplified methodology employed in this paper. The values of the two are 256.195 K/W and 246.732 K/W, respectively. The deviation of the model used in this paper does not exceed 4%.

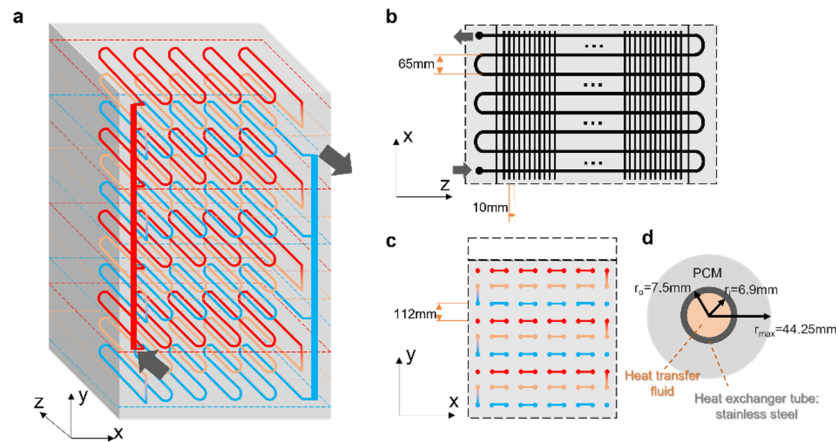

**Figure S4.** Structure information of the three-dimensional latent thermal energy storage unit <sup>11,12</sup>

The heat pump and latent thermal energy storage coupling model is substantiated via existing researches <sup>13,14</sup>. Detailed structural data and thermophysical attributes of phase change materials and the refrigerant are tabulated in Table S2. Paraffin, exhibiting a phase change temperature range of 40-44°C, serves as a verification subject, given that the integration of heat pumps and phase change materials with a phase transition temperature band of 10.5~22°C remains unexplored to its full potential and lacks comprehensive investigation. In order to verify the validity of the refrigerant and phase change material coupling model, we have performed a theoretical analysis on the heat storage power and compared it against the data gathered in the literature <sup>13</sup>. Fig. S5 presents the correlation between the predicted heat storage power and the PCM-side condensation temperature ranging from 54.7°C to 56.4°C alongside the air-side evaporation temperature of -26°C. While charged, the phase change material within the two-phase region gradually elevates temperature, accordingly increasing the condensation temperature of the heat pump. During this stage, the charging power displays a declining trend in fluctuations. The comparison between the results of our heat pump and latent thermal energy storage coupling model and the reference <sup>13</sup> reveals an average discrepancy of 7.71%, indicating an accurate prediction of the coupled heat transfer process.

**Table S2.** Detailed structure information and thermal properties of phase change materials and the refrigerant during heat transfer process <sup>13</sup>

|                   | Parameters          | Value |
|-------------------|---------------------|-------|
| Heat storage unit | Tube length per row | 6 m   |
|                   | Row number          | 16    |

|           |                                           |                         |
|-----------|-------------------------------------------|-------------------------|
|           | Outer radius of the heat exchanger tube   | 5 mm                    |
|           | Inner radius of the heat exchanger tube   | 4 mm                    |
|           | Heat exchanger tube                       | Copper                  |
|           | Pinch distance of the heat exchanger tube | 200 mm                  |
|           | Phase change temperature                  | 40–44°C                 |
|           | Thermal conductivity coefficient          | 0.2 W/m·K <sup>-1</sup> |
| Heat pump | Refrigerant                               | R410a                   |
|           | Compressor displacement                   | 34 m <sup>3</sup> /h    |
|           | Isentropic exponent of R410A              | 1.16                    |
|           | Evaporation temperature                   | -26°C                   |

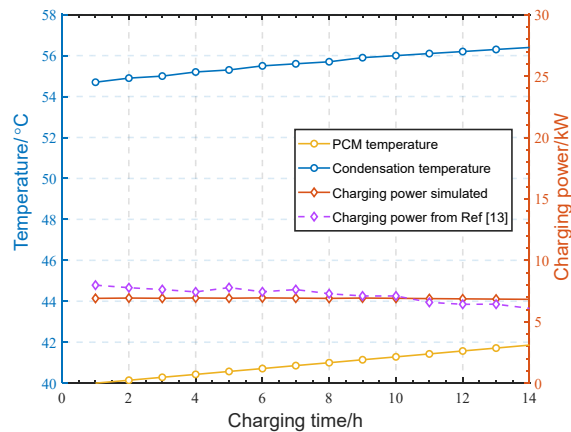

**Figure S5.** The comparison of charging power between the simulation and results from Ref. <sup>13</sup>

Based upon evaluation, validated mathematical models are utilized to thoroughly scrutinize operating characteristics and performance of the intermediate thermal energy storage system.

#### Note 4. Characterization of phase change materials

The properties of phase change materials fundamentally determine the configuration and operating conditions of the heat pump, alongside the whole system. Within this context, the focus is primarily directed toward the phase change temperature, latent heat of phase transition, specific heat capacity, and thermal conductivity, as well as the density of intermediate thermal energy storage materials as illustrated in Fig. S6.

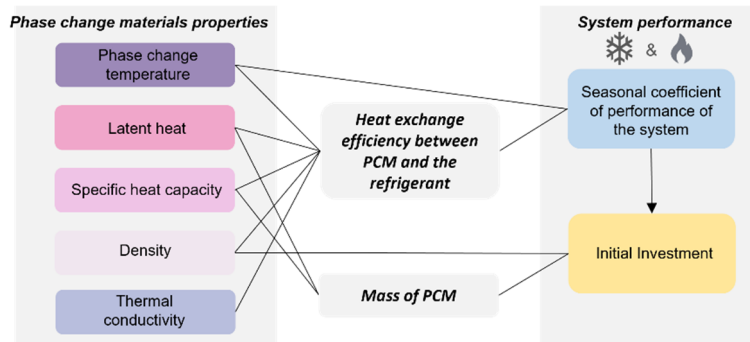

**Figure S6.** Thermophysical properties of phase change materials and their interconnection with

the system performance

The phase change temperature has an impact on the evaporation or condensation temperatures of four heat pump cycles for heating and cooling, consequently influencing the COP of heat pump cycles. The annual coefficient of performance of the intermediate thermal energy storage system is optimized by adjusting the temperature difference of the first and second heat pump cycles within an established temperature range between heat/cold supply temperatures and ambient temperatures. Moreover, fluctuations in refrigerant evaporation and condensation temperatures directly impact the convective heat transfer coefficient of the refrigerant, thereby affecting heat exchange performance. Both the Liu and Winterton correlation and Shah correlation underscore this point, indicating that evaporation and condensation temperatures alter refrigerant's thermal properties such as density, viscosity, specific heat capacity and enthalpy of phase transition, as well as thermal conductivity.

The latent heat and specific heat capacity serve as pivotal determinants in the mass of materials to store specific amounts of thermal energy according to eqn. (10). Along with density, these inherent characteristics impact the determination of the volume of contained phase change materials and the required heat transfer area. Given a predetermined heat transfer area, the geometry of the heat exchanger impacts the thermal resistance of the refrigerant and heat exchanger tube as demonstrated by eqn. (13)-(15). This secondary influence on the heat exchange efficiency dictates the heat exchange temperature difference between phase change materials and the refrigerant. It further modulates the annual coefficient of performance of the system. Moreover, alterations in the phase change materials mass and required heat transfer area of the heat exchanger affect the upfront capital expenditure of the intermediate thermal energy storage system.

Recognized as one of the underlying impediments to the mainstream adoption of thermal storage materials, enhancing the thermal conductivity of phase change materials is crucial. An undesirable low thermal conductivity significantly decelerates the energy charging and discharging processes. If the thermal conductivity of a substance is heightened, heat can be disseminated more swiftly within the substance, allotting a diminutive temperature difference between the fluid and the substance. Hence, thermal conductivity significantly affects the heat exchange efficiency between the phase change materials and the refrigerant, further impacting the steady-state heat transfer temperature difference between the storage unit and heat pumps, consequently impacting the evaporation or condensation temperature of heat pump cycles, thereby affecting the COP and the overall system performance.

## **Note 5. High-throughput screening of phase change materials**

Within the intermediate temperature band, numerous phase change materials are accessible. Nonetheless, the feasibility of materials is mainly determined by the phase change temperature and thermal conductivity enhancement degree defined by eqn (25). Targeting at the intermediate both heat and cold thermal energy storage and catering to the operation of the heat pump, a margin of  $T_s$  is established between the storage temperature of phase change materials and the ambient temperature in winter or summer <sup>15</sup>. Specifically, intermediate both heat and cold thermal energy storage mandates a moderate temperature differential between the storage temperature and ambient

in winter and summer. Moreover, to prevent near thresholds for evaporation and condensation of heat pumps, an operational allowance  $T_s$  is stipulated. Upon meeting the phase change temperature criteria  $T_{amb,w} + T_s < T_{pc} < T_{amb,s} - T_s$ , the material is validated as eligible and progresses to subsequent layers. This step serves to signify their potential application within an intermediate thermal energy storage mechanism.

Regarding potential phase change materials in the next layer, their application necessitates thermal conductivity enhancement as the majority of phase change materials exhibit inferior thermal conductivity, typically below 0.5 W/(m·K). The extent of thermal conductivity enhancement  $M_k$  ranges from 1.5 to 120 times with the inclusion of carbon-based or metal-based additive<sup>3</sup>. As such, given a predetermined steady-state heat transfer temperature difference, the required thermal conductivity enhancement degree is specified in eqn (25). Limited by the current thermal conductivity enhancement measures,  $M_k$  has to be less than  $M_{k,max}$  (assumed as 120<sup>3</sup>). Once the requisite improved thermal conductivity ensures technological feasibility for thermal conductivity enhancement, i.e.,  $M_k < M_{k,max}$ , it is qualified for subsequent layers.

$$M_k = \frac{k_{PCM,id}}{k_{PCM,ac}} \quad (25)$$

where,  $k_{PCM,ac}$  is the actual thermal conductivity of phase change material candidates,  $k_{PCM,id}$  is the requisite thermal conductivity with a predetermined steady-state heat transfer temperature difference.

The third layer pivots around the PCM-specified unit design to ascertain the viability of system functioning. The volume of storage phase change materials determines the required heat exchange area of heat exchanger tubes, specifically, the number of sets of heat exchanger tubes  $n_{set}$  and the length of one set of heat exchanger tubes. Herein, the feasibility of unit design is primarily dictated by its tube length. With maximum  $n_{set}$ , the longest single-group tube length is assumed as  $L_{max}$  (assumed as 6m here<sup>16</sup>), as tubes with excessive length exacerbate temperature distribution unevenness within the storage unit. Moreover, it also leads to an extended latent-sensible heat exchange stage when the refrigerant flows through the heat exchanger tube, thereby degrading the performance of the heat exchange process. In addition, given a maximum number of groups, if the length of one set of heat exchanger tubes remains greater than  $L_{max}$ , it will result in a significant increase in the cost of the storage unit, as the expenditure on heat exchangers constitutes a hefty share of the overall latent thermal energy storage cost<sup>16,17</sup>.

After confirming the feasibility of both materials and unit design, the subsequent two layers are primarily applied to evaluate prospective materials that exhibit superior energy and economic performance (detailed in Note S6).

## Note 6. Performance metrics of the TES system

The identification of performance indicators for this system is predominantly in line with the inherent energy and economic advantages, encompassing annual coefficient of performance and investment cost, as well as annual net income. These metrics particularly underscore their implications for energy consumption and cost efficacy.

The annual coefficient of performance of this system  $\eta$  takes into account the coefficient of performance in the heating case  $\eta_h$  and coefficient of performance in the cooling case  $\eta_c$ . The thermal energy exchanged with the ambient, either as output or input energy, is not incorporated within eqn (23) and (24), as it is perceived to be freely attainable. Consequently, the annual coefficient of performance of the system remains consistently comparable with the coefficient of performance (COP) of heat pumps.

$$\eta = \eta_h \omega_h + \eta_c \omega_c \quad (22)$$

$$\eta_h = \frac{Q_{hs}}{W' + W''} \quad (23)$$

$$\eta_c = \frac{Q_{cs}}{W' + W''} \quad (24)$$

where,  $\omega_h$  and  $\omega_c$  signify the ratio of heating days and cooling days to total number of thermal energy supply days.  $Q_{hs}$  and  $Q_{cs}$  refer to the daily heat and cold thermal energy consumption of users.  $W'$  and  $W''$  are the electricity consumed by the first and second stages of heat pump cycle.

Eqn (25) elucidates the investment costs  $C_0$  attributed to the integrated system.

$$C_0 = C_{com} + C_{txv} + C_{ex} + C_{TES} + C_{ref} \quad (25)$$

where,  $C_{com}$  is in unity with the acquisition costs of the compressor, encompassing both main body of the compressor and the electric motor.  $C_{txv}$  represents the cost of the expansion valve, and  $C_{ex}$  is the cost of heat exchangers functioning either as evaporators or condensers.  $C_{TES}$  pertains to the purchased cost of the latent thermal energy storage unit, comprising the cost of phase change materials along with their containment, ignoring the dead volume of the storage unit. The cost associated with shell and tube heat exchanger  $C_{ex}$  can be obtained from Ref. <sup>18,19</sup>.

$$C_{com} = a_1 k_1 \left( \frac{V}{0.9 - \eta_{is}} \right) \left( \frac{P_{3(3')}}{P_{2(2')}} \right) \left( \ln \frac{P_{3(3')}}{P_{2(2')}} \right) + a_2 k_2 p_e \left( \frac{\eta_{el}}{1 - \eta_{el}} \right) \quad (26)$$

$$C_{txv} = a_3 k_3 m_r \quad (27)$$

$$C_{ex} = a_4 k_4 m_w \sqrt{\frac{\eta_{eva(con)}}{1 - \eta_{eva(con)}}} \quad (28)$$

$$C_{TES} = a_5 (C_{PCM} m_{PCM} + C_{ex}) \quad (29)$$

where,  $a_m$  is the annuity factor for the  $m$ -th component, following  $a_m = \frac{i}{1 - (1+i)^{-n_m}}$ .  $i$  is an annual nominal interest rate, and  $n_m$  signifies the depreciation time of the  $m$ -th component.  $k_m$  refers to the cost coefficient of the components <sup>20</sup>.

In scenarios where specific material prices are either concealed or not publicly available due to commercial confidentiality, inferences can be made based on computations involving recognized phase change materials, which exhibit similar characteristics and properties.

$CF_{net}$  represents the annual cost benefits of the system, precisely determined by deducting operating expenses, including electrical power expenditure, from the income earned through heating and refrigeration production.

$$CF_{net} = K_{h\&c} Y_{h\&c} - K_{el} Y_{el} \quad (30)$$

where,  $K_{h\&c}$  is the price of heat/cold thermal energy generated through electricity, and  $K_{el}$  refers to the electricity cost when the heat pump operates to realize thermal energy provision.  $Y_{h\&c}$  signifies the daily heating and refrigeration production.  $Y_{el}$  denotes electricity consumption.

## Note 7. Separate heat and cold storage system

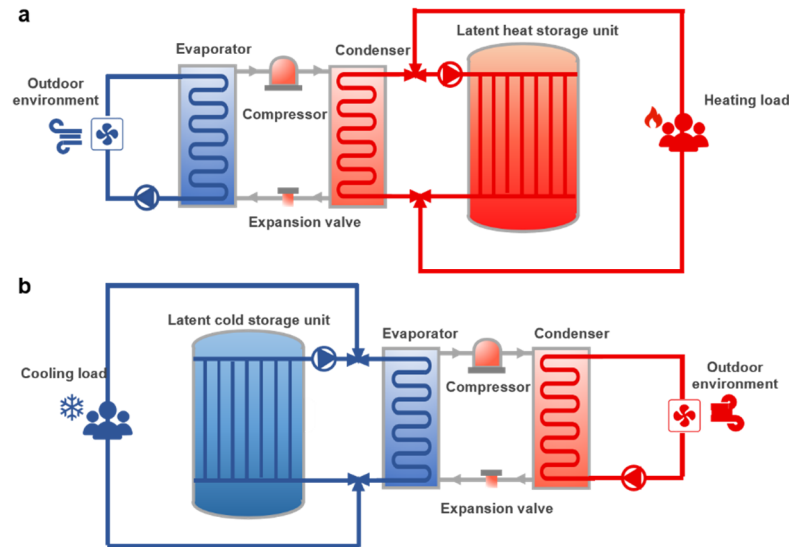

**Figure S7** Scheme of the separate heat and cold storage system: (a) conventional integration system for heating, (b) conventional integration system for cooling

The separate heat and cold storage system serves as one of the main comparison objects due to its substantial cost savings under time-of-use tariffs via thermal energy storage, as well as its compatibility with conventional heat pump systems.

In separate heat and cold storage systems, the heat pump is integrated with two separate heat and cold storage units in winter and summer, respectively. In winter, the condenser of an air-source heat pump is connected to a latent heat storage unit with a specific storage temperature, and the user is supplied with heat by the storage unit. In summer, the evaporator of the air-source heat pump is integrated with a latent cold storage unit with a specific storage temperature, and the user is supplied with cold by the storage unit.

**Table S3.** Phase change materials database for intermediate thermal energy storage

| No. | Materials                                                              | Phase change temperature/°C | Latent heat/J·g <sup>-1</sup> | Thermal conductivity /W·m <sup>-1</sup> ·K <sup>-1</sup> | Specific heat capacity (l) /kJ·kg <sup>-1</sup> ·K <sup>-1</sup> | Specific heat capacity (s) /kJ·kg <sup>-1</sup> ·K <sup>-1</sup> | Density /kg·m <sup>-3</sup> | Cost /\$.kg <sup>-1</sup> | Reference |
|-----|------------------------------------------------------------------------|-----------------------------|-------------------------------|----------------------------------------------------------|------------------------------------------------------------------|------------------------------------------------------------------|-----------------------------|---------------------------|-----------|
| 1   | RT10                                                                   | 10                          | 165                           | 0.2                                                      | 2                                                                | 2                                                                | 825                         | 42.22*                    | 21        |
| 2   | RT10 HC                                                                | 10                          | 200                           | 0.2                                                      | 2                                                                | 2                                                                | 825                         | 50.67*                    | 21        |
| 3   | S10                                                                    | 10                          | 170                           | 0.43                                                     | 1.9                                                              | 1.9                                                              | 1470                        | 25.14*                    | 22        |
| 4   | A10                                                                    | 10                          | 210                           | 0.22                                                     | 2.16                                                             | 2.16                                                             | 770                         | 25.14*                    | 22        |
| 5   | SP9_gel                                                                | 10.5                        | 155                           | 0.6                                                      | 2                                                                | 2                                                                | 1350                        | 42.22*                    | 21        |
| 6   | Isopropyl palmitate                                                    | 11                          | 98                            | 0.24                                                     | 1.78                                                             | 1.78                                                             | 852                         | 25*                       | 23,24     |
| 7   | RT11HC                                                                 | 11                          | 200                           | 0.2                                                      | 2                                                                | 2                                                                | 825                         | 50.67*                    | 21        |
| 8   | A11                                                                    | 11                          | 210                           | 0.22                                                     | 2.16                                                             | 2.16                                                             | 775                         | 25.14*                    | 22        |
| 9   | RT12                                                                   | 12                          | 165                           | 0.2                                                      | 2                                                                | 2                                                                | 825                         | 42.22*                    | 21        |
| 10  | A12                                                                    | 12                          | 215                           | 0.22                                                     | 2.16                                                             | 2.16                                                             | 775                         | 25.14*                    | 22        |
| 11  | Pelargonic acid                                                        | 12.3                        | 127                           | 0.129                                                    | 1.87                                                             | 1.866                                                            | 869.9                       | 0.9-10.6                  | 25,26     |
| 12  | SP11_gel                                                               | 12.5                        | 155                           | 0.6                                                      | 2                                                                | 2                                                                | 1325                        | 42.22*                    | 21        |
| 13  | S13                                                                    | 13                          | 150                           | 0.43                                                     | 1.9                                                              | 1.9                                                              | 1515                        | 25.14*                    | 22        |
| 14  | A13                                                                    | 13                          | 225                           | 0.22                                                     | 2.16                                                             | 2.16                                                             | 775                         | 25.14*                    | 22        |
| 15  | A14                                                                    | 14                          | 200                           | 0.22                                                     | 2.16                                                             | 2.16                                                             | 775                         | 25.14*                    | 22        |
| 16  | RT15                                                                   | 15                          | 155                           | 0.2                                                      | 2                                                                | 2                                                                | 825                         | 42.22*                    | 21        |
| 17  | S15                                                                    | 15                          | 180                           | 0.43                                                     | 1.9                                                              | 1.9                                                              | 1510                        | 25.14*                    | 22        |
| 18  | A15                                                                    | 15                          | 205                           | 0.18                                                     | 2.16                                                             | 2.16                                                             | 780                         | 25.14*                    | 22        |
| 19  | A16                                                                    | 16                          | 225                           | 0.18                                                     | 2.16                                                             | 2.16                                                             | 780                         | 25.14*                    | 22        |
| 20  | SP15_gel                                                               | 16                          | 160                           | 0.6                                                      | 2                                                                | 2                                                                | 1350                        | 42.22*                    | 21        |
| 21  | Caprylic acid                                                          | 16                          | 149                           | 0.145                                                    | 2.13                                                             | 1.46                                                             | 921.5                       | 3.5-120                   | 26-28     |
|     | Acetic acid                                                            | 16.7                        | 184                           | 0.18                                                     | 2.04                                                             | 2.04                                                             | 1050                        | 0.40-1.20                 | 26,29     |
| 23  | S17                                                                    | 17                          | 155                           | 0.43                                                     | 1.9                                                              | 1.9                                                              | 1525                        | 25.14*                    | 22        |
| 24  | A17                                                                    | 17                          | 235                           | 0.18                                                     | 2.18                                                             | 2.18                                                             | 780                         | 25.14*                    | 22        |
| 25  | Dodecanol                                                              | 17.5                        | 203                           | 0.14                                                     | 2.44                                                             | 2.44                                                             | 831                         | 119.3*                    | 23,30     |
| 26  | PCM RT18                                                               | 16-19                       | 134                           | 0.2                                                      | 2                                                                | 2                                                                | 756                         | 42.22*                    | 31        |
| 27  | Hexadecane paraffin                                                    | 18                          | 236                           | 0.085                                                    | 2.1                                                              | 1.65                                                             | 780                         | 1.0-20.0                  | 26,32     |
| 28  | RT18HC                                                                 | 18                          | 260                           | 0.2                                                      | 2                                                                | 2                                                                | 825                         | 50.67*                    | 21        |
| 29  | S18                                                                    | 18                          | 145                           | 0.43                                                     | 1.9                                                              | 1.9                                                              | 1520                        | 25.14*                    | 22        |
| 30  | A18                                                                    | 18                          | 155                           | 0.22                                                     | 2.18                                                             | 2.18                                                             | 765                         | 25.14*                    | 22        |
| 31  | Glycerin/Glycerol                                                      | 18.1                        | 199                           | 0.292                                                    | 1.25                                                             | 1.251                                                            | 1291                        | 1.6*                      | 25        |
| 32  | PCM-EP (Propyl Palmitate/Expanded Perlite-Based Form-Stable Composite) | 18.5                        | 82                            | 0.125                                                    | 1.9                                                              | 1.6                                                              | 559.5                       |                           | 33        |
| 33  | KF·4H <sub>2</sub> O                                                   | 18.5                        | 231                           | 0.48                                                     | 1.84                                                             | 1.84                                                             | 1437                        | 0.88-1.00                 | 23,24,26  |

|    |                                                                                                                      |                |      |       |      |       |       |           |       |
|----|----------------------------------------------------------------------------------------------------------------------|----------------|------|-------|------|-------|-------|-----------|-------|
| 34 | Butyl stearate                                                                                                       | 19             | 140  | 0.14  | 0.46 | 0.46  | 861   | 24*       | 23,24 |
| 35 | S19                                                                                                                  | 19             | 175  | 0.43  | 1.9  | 1.9   | 1520  | 25.14*    | 22    |
| 36 | A19                                                                                                                  | 19             | 150  | 0.22  | 2.18 | 2.18  | 765   | 25.14*    | 22    |
| 37 | S20                                                                                                                  | 20             | 195  | 0.54  | 2.2  | 2.2   | 1530  | 25.14*    | 22    |
| 38 | A20                                                                                                                  | 20             | 160  | 0.22  | 2.2  | 2.2   | 770   | 25.14*    | 22    |
| 39 | RT21                                                                                                                 | 21             | 165  | 0.2   | 2    | 2     | 825   | 42.22*    | 21    |
| 40 | RT21HC                                                                                                               | 21             | 190  | 0.2   | 2    | 2     | 825   | 50.67*    | 21    |
| 41 | S21                                                                                                                  | 21             | 220  | 0.54  | 2.2  | 2.2   | 1530  | 25.14*    | 22    |
| 42 | A21                                                                                                                  | 21             | 160  | 0.22  | 2.2  | 2.2   | 770   | 25.14*    | 22    |
| 43 | 8% wt. Expanded<br>graphite<br>nanosheets<br>92% wt. Paraffin,<br>nheptadecane<br>(C <sub>17</sub> H <sub>36</sub> ) | 21.1           | 26.2 | 0.419 | 2.24 | 2.312 | 658.5 | 8.16*     | 34    |
| 44 | n-Heptadecane                                                                                                        | 22             | 215  | 0.21  | 1.99 | 1.992 | 778   | 1.0-15.0  | 25,26 |
| 45 | RT22                                                                                                                 | 22             | 200  | 0.2   | 2    | 2     | 825   | 42.22*    | 35    |
| 46 | RT22HC                                                                                                               | 22             | 190  | 0.2   | 2    | 2     | 730   | 50.67*    | 21    |
| 47 | S22                                                                                                                  | 22             | 215  | 0.54  | 2.2  | 2.2   | 1530  | 25.14*    | 22    |
| 48 | A22                                                                                                                  | 22             | 160  | 0.18  | 2.2  | 2.2   | 785   | 25.14*    | 22    |
| 49 | SP21EK                                                                                                               | 22             | 170  | 0.5   | 2    | 2     | 1550  | 42.22*    | 21    |
| 50 | Natural TCM<br>energy saver                                                                                          | 18-26          | 179  | 0.375 | 1.79 | 1.785 | 1300  | 2.11*     | 36    |
| 51 | Paraffin(22°C)                                                                                                       | 22             | 165  | 0.1   | 2.8  | 2.8   | 900   | 1.88-2.00 | 37,38 |
| 52 | 80% paraffin +<br>15% HDPE + 5%<br>EG                                                                                | 17.03-26.97    | 148  | 0.2   | 2    | 2     | 825   | 2.22*     | 39    |
| 53 | S23                                                                                                                  | 23             | 200  | 0.54  | 2.2  | 2.2   | 1530  | 25.14*    | 22    |
| 54 | A23                                                                                                                  | 23             | 155  | 0.18  | 2.2  | 2.2   | 785   | 25.14*    | 22    |
| 55 | RT25                                                                                                                 | 23-25          | 160  | 0.2   | 3    | 3     | 820   | 42.22*    | 40    |
| 56 | RT24HC                                                                                                               | 24             | 200  | 0.2   | 2    | 2     | 750   | 50.67*    | 21    |
| 57 | S24                                                                                                                  | 24             | 180  | 0.54  | 2.2  | 2.2   | 1530  | 25.14*    | 22    |
| 58 | A24                                                                                                                  | 24             | 155  | 0.18  | 2.22 | 2.22  | 790   | 25.14*    | 22    |
| 59 | SP24E                                                                                                                | 24.5           | 180  | 0.5   | 2    | 2     | 1550  | 42.22*    | 21    |
| 60 | RT25HC                                                                                                               | 25             | 230  | 0.2   | 2    | 2     | 825   | 50.67*    | 21    |
| 61 | S25                                                                                                                  | 25             | 175  | 0.54  | 2.2  | 2.2   | 1530  | 25.14*    | 22    |
| 62 | A25                                                                                                                  | 25             | 220  | 0.18  | 2.22 | 2.22  | 785   | 25.14*    | 22    |
| 63 | SP25E2                                                                                                               | 25             | 180  | 0.5   | 2    | 2     | 1550  | 42.22*    | 21    |
| 64 | DuPont Energain®<br>M27 (biobased)                                                                                   | 21,23,25,27,29 | 200  | 0.2   | 1.97 | 1.97  | 235   | 1.65-5.55 | 41    |
| 65 | Bio-PCM Q23                                                                                                          | 25.5           | 70   | 0.157 | 0.84 | 0.837 | 801   | 2         | 42    |
| 66 | SP-25 A8                                                                                                             | 25-26          | 180  | 0.6   | 2.5  | 2.5   | 1380  | 42.22*    | 43    |
| 67 | Lauryl alcohol                                                                                                       | 25.83          | 216  | 0.144 | 2.32 | 2.322 | 890.9 | 1.85-100  | 25,26 |

|    |                                                                                                                                  |           |       |       |      |       |       |            |          |
|----|----------------------------------------------------------------------------------------------------------------------------------|-----------|-------|-------|------|-------|-------|------------|----------|
| 68 | A26                                                                                                                              | 26        | 230   | 0.21  | 2.22 | 2.22  | 790   | 25.14*     | 22       |
| 69 | SP26E                                                                                                                            | 26        | 180   | 0.5   | 2    | 2     | 1550  | 42.22*     | 21       |
| 70 | Micronal<br>PCM®DS 5001 X                                                                                                        | 26        | 120   | 0.55  | 1.07 | 1.1   | 1248  | 4.31       | 44       |
| 71 | CADE (mixture of<br>capric acid+1-<br>dodecanol)                                                                                 | 26.1-26.5 | 127   | 0.16  | 2.08 | 1.89  | 785.5 | 15.55*     | 45       |
| 72 |                                                                                                                                  | 25-28     | 184   | 0.2   | 4.81 | 3.11  | 880   |            | 46       |
| 73 | Na <sub>2</sub> HPO <sub>4</sub> ·12H <sub>2</sub> O -<br>K <sub>2</sub> HPO <sub>4</sub> ·3H <sub>2</sub> O<br>SiO <sub>2</sub> | 26.5      | 145.3 | 0.3   | 2.1  | 2.1   | 1000  | 3.33*      |          |
| 74 | RT25                                                                                                                             | 26.6      | 232   | 0.185 | 1.8  | 1.41  | 767   | 42.22*     | 47,48    |
| 75 | Paraffin RT27                                                                                                                    | 26-28     | 179   | 0.2   | 2.4  | 1.8   | 810   | 42.22*     | 43       |
| 76 | S27                                                                                                                              | 27        | 185   | 0.54  | 2.2  | 2.2   | 1530  | 25.14*     | 22       |
| 77 | A27                                                                                                                              | 27        | 250   | 0.22  | 2.22 | 2.22  | 768   | 25.14*     | 22       |
| 78 | RT27 paraffin +<br>SBS                                                                                                           | 27        | 110   | 0.23  | 2.5  | 2.8   | 805.5 | 36.32*     | 49       |
| 79 | GR27                                                                                                                             | 27        | 64.9  | 0.2   | 1.92 | 2.044 | 1360  | 42.22*     | 50,51    |
| 80 | Octadecane<br>paraffin                                                                                                           | 28        | 244   | 0.26  | 2.1  | 1.75  | 780   | 1.0-20.0   | 26,32    |
| 81 |                                                                                                                                  | 27-29     | 205   | 0.21  | 2.23 | 2.23  | 850   |            | 52       |
| 82 | RT28HC                                                                                                                           | 28        | 250   | 0.2   | 2    | 2     | 825   | 50.67*     | 21       |
| 83 | A28                                                                                                                              | 28        | 265   | 0.21  | 2.22 | 2.22  | 789   | 25.14*     | 22       |
| 84 | Paraffin(28.2°C)                                                                                                                 | 28.2      | 245   | 0.25  | 2.2  | 1.934 | 794.5 | 1.88-2.00  | 38,53    |
| 85 | A29                                                                                                                              | 29        | 230   | 0.21  | 2.22 | 2.22  | 785   | 25.14*     | 22       |
| 86 | In-organic                                                                                                                       | 29        | 220   | 0.805 | 1.7  | 1.46  | 1260  |            | 54       |
| 87 | Capric acid                                                                                                                      | 29.3      | 162   | 0.265 | 2    | 2     | 941   | 1-100      | 55       |
| 88 | CaCl <sub>2</sub> ·12H <sub>2</sub> O                                                                                            | 29.8      | 174   | 0.81  | 1.4  | 2.2   | 1710  | 0.13-0.2   | 38,56    |
| 89 | CaCl <sub>2</sub> ·6H <sub>2</sub> O                                                                                             | 29.9      | 187   | 0.81  | 1.4  | 2.2   | 1682  | 0.1 - 0.19 | 26,56,57 |
| 90 | A30                                                                                                                              | 30        | 230   | 0.21  | 2.22 | 2.22  | 790   | 25.14*     | 22       |

\*Quotations from commercial companies

**Table S4.** Main parameters in operations of the intermediate thermal energy storage system

|                        | Parameters                                         | Value                                  |
|------------------------|----------------------------------------------------|----------------------------------------|
| Operational parameters | Indoor room temperature                            | 295.15 K                               |
|                        | Pinch temperature between HP and the ambient/users | 5 K                                    |
|                        | Charging period ( $\tau_{charge}$ )                | 8 h                                    |
|                        | Discharging period ( $\tau_{discharge}$ )          | 5 h                                    |
| Economic parameters    | Annual nominal interest rate ( $i$ )               | 5%                                     |
|                        | Depreciation time of components ( $n_m$ )          | 12 years <sup>20</sup>                 |
|                        | Cost coefficient of HP components ( $k_m$ )        | 6560, 0.09, 4621, 4621\$ <sup>20</sup> |

**Table S5.** Parameters of heat pumps and thermal energy storage coupling model

|                      | Parameters                                                                                               | Value                   |
|----------------------|----------------------------------------------------------------------------------------------------------|-------------------------|
| Geometric parameters | Outer radius of the heat exchanger tube ( $r_o$ )                                                        | 5mm                     |
|                      | Inner radius of the heat exchanger tube ( $r_i$ )                                                        | 4mm                     |
|                      | Pinch distance of the heat exchanger tube                                                                | 70mm                    |
| Other parameters     | Thermal conductivity of heat exchanger ( $k_{ex}$ )                                                      | 100 W/(m·K)             |
|                      | Maximum temperature difference between PCM and refrigerant ( $\Delta T$ )                                | 3K                      |
|                      | Margin temperature between PCM and the ambient ( $T_s$ )                                                 | 3K                      |
|                      | Surface area of the building enclosed structure ( $A$ )                                                  | 125 m <sup>2</sup>      |
|                      | Heat transfer coefficient of the enclosed structure ( $K_1$ )                                            | 8 W/(m <sup>2</sup> ·K) |
|                      | Ratio of heat dissipation capacity of a dwelling to heat transfer capacity of a radiator ( $AK_1/FK_2$ ) | 1.5                     |
|                      |                                                                                                          |                         |

**Table S6.** Advantageous phase change materials for specific countries/regions

| Countries/regions                     | Advantageous phase change materials | Phase change temperature | Material type               |
|---------------------------------------|-------------------------------------|--------------------------|-----------------------------|
| Afghanistan                           | S21                                 | 21                       | Inorganic hydrated salt     |
| Albania                               | SP15_gel                            | 16                       | Inorganic macroencapsulated |
| Algeria                               | RT21HC                              | 21                       | Organic                     |
| Argentina                             | A20                                 | 20                       | Organic                     |
| Armenia                               | S15                                 | 15                       | Inorganic hydrated salt     |
| Azerbaijan                            | A16                                 | 16                       | Organic                     |
| Bhutan                                | Butyl stearate                      | 19                       | Organic                     |
| Bosnia and Herzegovina                | S15                                 | 15                       | Inorganic hydrated salt     |
| Bulgaria                              | S15                                 | 15                       | Inorganic hydrated salt     |
| Croatia                               | S15                                 | 15                       | Inorganic hydrated salt     |
| Cyprus                                | RT18HC                              | 18                       | Organic                     |
| Democratic People's Republic of Korea | SP15_gel                            | 16                       | Inorganic macroencapsulated |
| France                                | Caprylic acid                       | 16                       | Organic                     |
| Georgia                               | S15                                 | 15                       | Inorganic hydrated salt     |
| Greece                                | A21                                 | 21                       | Organic                     |
| Hungary                               | A16                                 | 16                       | Organic                     |
| Iraq                                  | n-Heptadecane                       | 22                       | Organic paraffin            |
| Islamic Republic of Iran              | S21                                 | 21                       | Inorganic hydrated salt     |
| Israel                                | A21                                 | 21                       | Organic                     |
| Italy                                 | S20                                 | 20                       | Inorganic hydrated salt     |
| Japan                                 | S19                                 | 19                       | Inorganic hydrated salt     |
| Jordan                                | A21                                 | 21                       | Organic                     |
| Kazakhstan                            | SP9_gel                             | 10.5                     | Inorganic macroencapsulated |
| Korea                                 | A17                                 | 17                       | Organic                     |
| Kuwait                                | RT21HC                              | 21                       | Organic                     |
| Kyrgyzstan                            | SP15_gel                            | 16                       | Inorganic macroencapsulated |
| Lebanon                               | S18                                 | 18                       | Inorganic hydrated salt     |
| Malta                                 | A21                                 | 21                       | Organic                     |
| Mongolia                              | SP15_gel                            | 16                       | Inorganic macroencapsulated |
| Montenegro                            | S15                                 | 15                       | Inorganic hydrated salt     |
| Morocco                               | A20                                 | 20                       | Organic                     |
| Nepal                                 | S19                                 | 19                       | Inorganic hydrated salt     |
| Norfolk Island                        | A19                                 | 19                       | Organic                     |
| Peru                                  | A19                                 | 19                       | Organic                     |

|                                |                   |      |                                |
|--------------------------------|-------------------|------|--------------------------------|
| Plurinational State of Bolivia | RT18HC            | 18   | Organic                        |
| Republic of Moldova            | S13               | 13   | Inorganic hydrated salt        |
| Republic of North Macedonia    | S15               | 15   | Inorganic hydrated salt        |
| Romania                        | S13               | 13   | Inorganic hydrated salt        |
| Serbia                         | S17               | 17   | Inorganic hydrated salt        |
| Slovenia                       | S15               | 15   | Inorganic hydrated salt        |
| Spain                          | S18               | 18   | Inorganic hydrated salt        |
| State of Palestine             | A21               | 21   | Organic                        |
| Swaziland                      | A17               | 17   | Organic                        |
| Syrian Arab Republic           | n-Heptadecane     | 22   | Organic paraffin               |
| Tajikistan                     | S21               | 21   | Inorganic hydrated salt        |
| Tunisia                        | A21               | 21   | Organic                        |
| Turkey                         | Glycerin/Glycerol | 18.1 | Organic                        |
| Turkmenistan                   | S22               | 22   | Inorganic hydrated salt        |
| Ukraine                        | SP15_gel          | 16   | Inorganic<br>macroencapsulated |
| Uruguay                        | S18               | 18   | Inorganic hydrated salt        |
| Uzbekistan                     | S19               | 19   | Inorganic hydrated salt        |

**Table S7.** Advantageous phase change materials for specific subnational states/ provinces/ autonomous regions

| Subnational states/provinces/autonomous | Advantageous phase change materials | Phase change temperature | Material type               |
|-----------------------------------------|-------------------------------------|--------------------------|-----------------------------|
| New South Wales                         | PCM RT18                            | 17.5                     | Organic                     |
| South Australia                         | A18                                 | 18                       | Organic                     |
| Rio Grande do Sul                       | Dodecanol                           | 17.5                     | Organic                     |
| Ontario                                 | SP15_gel                            | 16                       | Inorganic macroencapsulated |
| Anhui                                   | S19                                 | 19                       | Inorganic hydrated salt     |
| Beijing                                 | Acetic acid                         | 16.7                     | Organic                     |
| Chongqing                               | Natural TCM energy saver            | 22                       | Natural materials           |
| Fujian                                  | A22                                 | 22                       | Organic                     |
| Gansu                                   | SP11_gel                            | 12.5                     | Inorganic macroencapsulated |
| Guizhou                                 | RT18HC                              | 18                       | Organic                     |
| Henan                                   | S19                                 | 19                       | Inorganic hydrated salt     |
| Hubei                                   | n-Heptadecane                       | 22                       | Organic paraffin            |
| Hebei                                   | S20                                 | 20                       | Inorganic hydrated salt     |
| Heilongjiang                            | S15                                 | 15                       | Inorganic hydrated salt     |
| Hunan                                   | n-Heptadecane                       | 22                       | Organic paraffin            |
| Jilin                                   | S13                                 | 13                       | Inorganic hydrated salt     |
| Jiangsu                                 | Natural TCM energy saver            | 22                       | Natural materials           |
| Jiangxi                                 | n-Heptadecane                       | 22                       | Organic paraffin            |
| Liaoning                                | SP9_gel                             | 10.5                     | Inorganic macroencapsulated |
| Nei Mongol                              | S15                                 | 15                       | Inorganic hydrated salt     |
| Ningxia Hui                             | Acetic acid                         | 16.7                     | Organic                     |
| Sichuan                                 | RT21HC                              | 21                       | Organic                     |
| Shandong                                | S20                                 | 20                       | Inorganic hydrated salt     |
| Shanghai                                | Paraffin                            | 22                       | Organic paraffin            |
| Shaanxi                                 | Acetic acid                         | 16.7                     | Organic                     |
| Shanxi                                  | SP11_gel                            | 12.5                     | Inorganic macroencapsulated |
| Tianjin                                 | S18                                 | 18                       | Inorganic hydrated salt     |
| Xinjiang Uygur                          | S20                                 | 20                       | Inorganic hydrated salt     |
| Yunnan                                  | A20                                 | 20                       | Organic                     |
| Zhejiang                                | n-Heptadecane                       | 22                       | Organic paraffin            |
| Delhi                                   | A21                                 | 21                       | Organic                     |
| Himachal Pradesh                        | RT21HC                              | 21                       | Organic                     |
| Haryana                                 | A21                                 | 21                       | Organic                     |
| Punjab                                  | A21                                 | 21                       | Organic                     |
| Uttaranchal                             | RT21HC                              | 21                       | Organic                     |
| Adygey                                  | Acetic acid                         | 16.7                     | Organic                     |

|                 |                          |      |                             |
|-----------------|--------------------------|------|-----------------------------|
| Altay           | S15                      | 15   | Inorganic hydrated salt     |
| Astrakhan'      | S18                      | 18   | Inorganic hydrated salt     |
| Chechnya        | Acetic acid              | 16.7 | Organic                     |
| Dagestan        | A13                      | 13   | Organic                     |
| Kabardin-Balkar | SP11_gel                 | 12.5 | Inorganic macroencapsulated |
| Krasnodar       | Acetic acid              | 16.7 | Organic                     |
| Kalmyk          | SP15_gel                 | 16   | Inorganic macroencapsulated |
| Orenburg        | S13                      | 13   | Inorganic hydrated salt     |
| Rostov          | Acetic acid              | 16.7 | Organic                     |
| Samara          | SP9_gel                  | 10.5 | Inorganic macroencapsulated |
| Saratov         | SP9_gel                  | 10.5 | Inorganic macroencapsulated |
| North Ossetia   | A13                      | 13   | Organic                     |
| Stavropol'      | S13                      | 13   | Inorganic hydrated salt     |
| Volgograd       | S17                      | 17   | Inorganic hydrated salt     |
| Alabama         | RT18HC                   | 18   | Organic                     |
| Arkansas        | n-Heptadecane            | 22   | Organic paraffin            |
| Arizona         | n-Heptadecane            | 22   | Organic paraffin            |
| California      | Butyl stearate           | 19   | Organic                     |
| Colorado        | SP11_gel                 | 12.5 | Inorganic macroencapsulated |
| Connecticut     | S17                      | 17   | Inorganic hydrated salt     |
| Delaware        | Glycerin/Glycerol        | 18.1 | Organic                     |
| Georgia         | S15                      | 15   | Inorganic hydrated salt     |
| Iowa            | SP15_gel                 | 16   | Inorganic macroencapsulated |
| Idaho           | S13                      | 13   | Inorganic hydrated salt     |
| Illinois        | Acetic acid              | 16.7 | Organic                     |
| Indiana         | Acetic acid              | 16.7 | Organic                     |
| Kansas          | Natural TCM energy saver | 22   | Natural materials           |
| Kentucky        | A17                      | 17   | Organic                     |
| Louisiana       | Natural TCM energy saver | 22   | Natural materials           |
| Massachussets   | S17                      | 17   | Inorganic hydrated salt     |
| Maryland        | A17                      | 17   | Organic                     |
| Michigan        | Acetic acid              | 16.7 | Organic                     |
| Minnesota       | S15                      | 15   | Inorganic hydrated salt     |
| Missouri        | Natural TCM energy saver | 22   | Natural materials           |
| Mississippi     | RT18HC                   | 18   | Organic                     |
| Montana         | SP15_gel                 | 16   | Inorganic macroencapsulated |
| North Carolina  | Dodecanol                | 17.5 | Organic                     |
| North Dakota    | SP9_gel                  | 10.5 | Inorganic macroencapsulated |
| Nebraska        | S15                      | 15   | Inorganic hydrated salt     |
| New Hampshire   | Acetic acid              | 16.7 | Organic                     |

|                |                          |      |                             |
|----------------|--------------------------|------|-----------------------------|
| New Jersey     | A17                      | 17   | Organic                     |
| New Mexico     | S19                      | 19   | Inorganic hydrated salt     |
| Nevada         | Natural TCM energy saver | 22   | Natural materials           |
| New York       | S17                      | 17   | Inorganic hydrated salt     |
| Ohio           | A17                      | 17   | Organic                     |
| Oklahoma       | Natural TCM energy saver | 22   | Natural materials           |
| Oregon         | A15                      | 15   | Organic                     |
| Pennsylvania   | S17                      | 17   | Inorganic hydrated salt     |
| Rhode Island   | Acetic acid              | 16.7 | Organic                     |
| South Carolina | Natural TCM energy saver | 22   | Natural materials           |
| South Dakota   | S17                      | 17   | Inorganic hydrated salt     |
| Tennessee      | S19                      | 19   | Inorganic hydrated salt     |
| Texas          | S17                      | 17   | Inorganic hydrated salt     |
| Utah           | SP11_gel                 | 12.5 | Inorganic macroencapsulated |
| Virginia       | Dodecanol                | 17.5 | Organic                     |
| Washington     | A15                      | 15   | Organic                     |
| Wisconsin      | S17                      | 17   | Inorganic hydrated salt     |
| West Virginia  | Acetic acid              | 16.7 | Organic                     |
| Wyoming        | SP15_gel                 | 16   | Inorganic macroencapsulated |

**Table S8.** Detailed design and operation parameters of setups in specific countries/regions

| Countries/regions                     | Mass of phase change materials/kg | Maximum refrigerant flow rate/m <sup>3</sup> ·h <sup>-1</sup> | Length of heat exchange tube in LTES/m | Sets of heat exchange tube in LTES |
|---------------------------------------|-----------------------------------|---------------------------------------------------------------|----------------------------------------|------------------------------------|
| Afghanistan                           | 102.53                            | 43.73                                                         | 5.93                                   | 3                                  |
| Albania                               | 114.78                            | 32.16                                                         | 5.64                                   | 4                                  |
| Algeria                               | 82.28                             | 24.86                                                         | 5.29                                   | 5                                  |
| Argentina                             | 91.20                             | 23.49                                                         | 5.24                                   | 6                                  |
| Armenia                               | 127.86                            | 47.59                                                         | 5.62                                   | 4                                  |
| Azerbaijan                            | 89.19                             | 36.54                                                         | 5.06                                   | 6                                  |
| Bhutan                                | 113.66                            | 24.79                                                         | 5.84                                   | 6                                  |
| Bosnia and Herzegovina                | 114.60                            | 38.60                                                         | 5.03                                   | 4                                  |
| Bulgaria                              | 116.41                            | 39.48                                                         | 5.11                                   | 4                                  |
| Croatia                               | 110.84                            | 36.60                                                         | 4.87                                   | 4                                  |
| Cyprus                                | 52.56                             | 21.17                                                         | 5.63                                   | 3                                  |
| Democratic People's Republic of Korea | 149.54                            | 51.37                                                         | 5.88                                   | 5                                  |
| France                                | 124.54                            | 32.65                                                         | 5.97                                   | 6                                  |
| Georgia                               | 115.64                            | 39.06                                                         | 5.08                                   | 4                                  |
| Greece                                | 104.41                            | 27.65                                                         | 5.99                                   | 6                                  |
| Hungary                               | 94.69                             | 40.06                                                         | 5.37                                   | 6                                  |
| Iraq                                  | 82.55                             | 25.99                                                         | 5.63                                   | 5                                  |
| Islamic Republic of Iran              | 97.73                             | 40.39                                                         | 5.65                                   | 3                                  |
| Israel                                | 82.59                             | 20.50                                                         | 5.69                                   | 5                                  |
| Italy                                 | 94.04                             | 31.84                                                         | 5.43                                   | 3                                  |
| Japan                                 | 111.26                            | 34.88                                                         | 4.85                                   | 4                                  |
| Jordan                                | 99.79                             | 26.03                                                         | 5.73                                   | 6                                  |
| Kazakhstan                            | 159.60                            | 62.49                                                         | 5.23                                   | 6                                  |
| Korea                                 | 92.86                             | 41.81                                                         | 5.26                                   | 6                                  |
| Kuwait                                | 103.17                            | 21.33                                                         | 5.53                                   | 6                                  |
| Kyrgyzstan                            | 145.42                            | 48.49                                                         | 5.71                                   | 5                                  |
| Lebanon                               | 111.64                            | 27.06                                                         | 4.87                                   | 4                                  |
| Malta                                 | 73.11                             | 17.61                                                         | 5.04                                   | 5                                  |
| Mongolia                              | 171.83                            | 75.02                                                         | 5.63                                   | 6                                  |
| Montenegro                            | 109.74                            | 36.04                                                         | 4.82                                   | 4                                  |
| Morocco                               | 84.63                             | 21.30                                                         | 5.83                                   | 5                                  |
| Nepal                                 | 89.53                             | 25.63                                                         | 5.21                                   | 3                                  |
| Norfolk Island                        | 62.56                             | 13.77                                                         | 5.42                                   | 4                                  |
| Peru                                  | 69.24                             | 15.54                                                         | 4.80                                   | 5                                  |
| Plurinational State of Bolivia        | 51.42                             | 20.54                                                         | 5.51                                   | 3                                  |
| Republic of Moldova                   | 146.40                            | 45.00                                                         | 5.13                                   | 5                                  |

|                             |        |       |      |   |
|-----------------------------|--------|-------|------|---|
| Republic of North Macedonia | 115.52 | 38.99 | 5.07 | 4 |
| Romania                     | 142.14 | 42.67 | 4.98 | 5 |
| Serbia                      | 135.49 | 39.38 | 5.89 | 4 |
| Slovenia                    | 114.83 | 38.72 | 5.04 | 4 |
| Spain                       | 108.62 | 25.91 | 4.74 | 4 |
| State of Palestine          | 88.62  | 22.39 | 5.09 | 6 |
| Swaziland                   | 51.02  | 18.31 | 5.78 | 3 |
| Syrian Arab Republic        | 82.92  | 30.14 | 5.65 | 5 |
| Tajikistan                  | 102.61 | 43.79 | 5.93 | 3 |
| Tunisia                     | 87.01  | 21.88 | 5.99 | 5 |
| Turkey                      | 101.61 | 36.56 | 5.22 | 4 |
| Turkmenistan                | 100.26 | 40.42 | 5.79 | 3 |
| Ukraine                     | 144.48 | 47.88 | 5.68 | 5 |
| Uruguay                     | 97.25  | 22.65 | 5.66 | 3 |
| Uzbekistan                  | 124.56 | 42.09 | 5.43 | 4 |

**Table S9.** Detailed design and operation parameters of setups in specific subnational states/ provinces/ autonomous regions

| Subnational states/provinces/autonomous | Mass of phase change materials/kg | Maximum refrigerant flow rate/m <sup>3</sup> ·h <sup>-1</sup> | Length of heat exchange tube in LTES/m | Sets of heat exchange tube in LTES |
|-----------------------------------------|-----------------------------------|---------------------------------------------------------------|----------------------------------------|------------------------------------|
| New South Wales                         | 95.99                             | 20.95                                                         | 5.58                                   | 3                                  |
| South Australia                         | 91.74                             | 21.57                                                         | 5.30                                   | 6                                  |
| Rio Grande do Sul                       | 67.50                             | 20.40                                                         | 5.39                                   | 4                                  |
| Ontario                                 | 161.03                            | 47.44                                                         | 5.27                                   | 6                                  |
| Anhui                                   | 121.74                            | 35.72                                                         | 5.31                                   | 4                                  |
| Beijing                                 | 140.2061                          | 47.52                                                         | 5.9033                                 | 6                                  |
| Chongqing                               | 101.92                            | 28.52                                                         | 5.20                                   | 4                                  |
| Fujian                                  | 99.46                             | 24.07                                                         | 5.60                                   | 6                                  |
| Gansu                                   | 155.56                            | 44.40                                                         | 5.19                                   | 6                                  |
| Guizhou                                 | 73.36                             | 30.05                                                         | 5.90                                   | 4                                  |
| Henan                                   | 126.57                            | 37.54                                                         | 5.52                                   | 4                                  |
| Hubei                                   | 95.93                             | 33.55                                                         | 5.45                                   | 6                                  |
| Hebei                                   | 130.85                            | 46.57                                                         | 5.67                                   | 4                                  |
| Heilongjiang                            | 177.65                            | 69.71                                                         | 5.20                                   | 6                                  |
| Hunan                                   | 90.74                             | 31.27                                                         | 5.16                                   | 6                                  |
| Jilin                                   | 197.09                            | 62.52                                                         | 5.75                                   | 6                                  |
| Jiangsu                                 | 123.21                            | 36.87                                                         | 5.03                                   | 5                                  |
| Jiangxi                                 | 88.56                             | 30.24                                                         | 5.03                                   | 6                                  |
| Liaoning                                | 170.82                            | 52.79                                                         | 5.59                                   | 6                                  |
| Nei Mongol                              | 165.79                            | 60.93                                                         | 5.82                                   | 5                                  |
| Ningxia Hui                             | 140.52                            | 47.05                                                         | 5.92                                   | 6                                  |
| Sichuan                                 | 96.85                             | 28.36                                                         | 5.19                                   | 6                                  |
| Shandong                                | 121.73                            | 41.37                                                         | 5.28                                   | 4                                  |
| Shanghai                                | 118.2749238                       | 32.76                                                         | 5.8692                                 | 6                                  |
| Shaanxi                                 | 123.62                            | 39.03                                                         | 5.20                                   | 6                                  |
| Shanxi                                  | 158.57                            | 45.70                                                         | 5.29                                   | 6                                  |
| Tianjin                                 | 172.40                            | 44.77                                                         | 5.01                                   | 6                                  |
| Xinjiang Uygur                          | 143.06                            | 52.77                                                         | 4.96                                   | 5                                  |
| Yunnan                                  | 98.97                             | 24.30                                                         | 5.68                                   | 6                                  |
| Zhejiang                                | 91.61                             | 31.48                                                         | 5.21                                   | 6                                  |
| Delhi                                   | 94.72                             | 17.56                                                         | 5.44                                   | 6                                  |
| Himachal Pradesh                        | 96.99                             | 28.41                                                         | 5.20                                   | 6                                  |
| Haryana                                 | 87.10                             | 17.97                                                         | 5.00                                   | 6                                  |
| Punjab                                  | 83.40                             | 19.34                                                         | 5.75                                   | 5                                  |
| Uttaranchal                             | 82.21                             | 23.19                                                         | 5.29                                   | 5                                  |
| Adygey                                  | 123.78                            | 39.11                                                         | 5.21                                   | 6                                  |
| Altay                                   | 169.18                            | 63.26                                                         | 5.94                                   | 5                                  |

|                 |        |             |        |   |
|-----------------|--------|-------------|--------|---|
| Astrakhan'      | 180.43 | 48.05       | 5.25   | 6 |
| Chechnya        | 128.96 | 41.08       | 5.43   | 6 |
| Dagestan        | 102.64 | 40.73       | 5.86   | 6 |
| Kabardin-Balkar | 152.24 | 43.00       | 5.08   | 6 |
| Krasnodar       | 123.84 | 39.13       | 5.21   | 6 |
| Kalmyk          | 158.59 | 46.65       | 5.19   | 6 |
| Orenburg        | 196.45 | 61.79       | 5.73   | 6 |
| Rostov          | 139.83 | 46.80       | 5.89   | 6 |
| Samara          | 179.97 | 57.77       | 5.89   | 6 |
| Saratov         | 177.48 | 56.36       | 5.81   | 6 |
| North Ossetia   | 104.21 | 41.63       | 5.94   | 6 |
| Stavropol'      | 157.04 | 42.34       | 5.50   | 5 |
| Volgograd       | 178.42 | 53.01       | 5.17   | 6 |
| Alabama         | 72.53  | 29.80       | 5.83   | 4 |
| Arkansas        | 100.03 | 35.55       | 5.68   | 6 |
| Arizona         | 75.33  | 24.54       | 5.14   | 5 |
| California      | 109.71 | 22.36       | 5.63   | 6 |
| Colorado        | 157.16 | 45.08       | 5.24   | 6 |
| Connecticut     | 150.39 | 40.49       | 5.23   | 5 |
| Delaware        | 112.44 | 36.21       | 5.77   | 4 |
| Georgia         | 100.79 | 29.87       | 5.40   | 6 |
| Iowa            | 163.43 | 48.61       | 5.35   | 6 |
| Idaho           | 157.30 | 42.44       | 5.51   | 5 |
| Illinois        | 137.00 | 45.64       | 5.77   | 6 |
| Indiana         | 133.00 | 43.23       | 5.60   | 6 |
| Kansas          | 137.27 | 42.85       | 5.60   | 5 |
| Kentucky        | 95.86  | 37.91       | 5.43   | 6 |
| Louisiana       | 98.29  | 27.11       | 5.01   | 4 |
| Massachussets   | 151.45 | 40.90       | 5.27   | 5 |
| Maryland        | 95.12  | 37.50       | 5.39   | 6 |
| Michigan        | 138.75 | 46.16       | 5.84   | 6 |
| Minnesota       | 135.79 | 42.20199774 | 5.4588 | 5 |
| Missouri        | 135.79 | 42.20       | 5.54   | 5 |
| Mississippi     | 72.46  | 29.76       | 5.82   | 4 |
| Montana         | 161.00 | 47.43       | 5.27   | 6 |
| North Carolina  | 98.65  | 32.74       | 5.25   | 6 |
| North Dakota    | 177.54 | 56.85       | 5.81   | 6 |
| Nebraska        | 141.47 | 47.07       | 4.97   | 5 |
| New Hampshire   | 135.60 | 44.95       | 5.71   | 6 |
| New Jersey      | 97.75  | 38.90       | 5.54   | 6 |
| New Mexico      | 125.71 | 36.96       | 5.48   | 4 |
| Nevada          | 110.56 | 31.95       | 5.64   | 4 |
| New York        | 151.88 | 41.06       | 5.28   | 5 |

|                |        |       |      |   |
|----------------|--------|-------|------|---|
| Ohio           | 103.79 | 42.27 | 5.88 | 6 |
| Oklahoma       | 123.33 | 37.12 | 5.03 | 5 |
| Oregon         | 96.14  | 31.89 | 5.45 | 6 |
| Pennsylvania   | 151.62 | 40.96 | 5.27 | 5 |
| Rhode Island   | 125.99 | 40.22 | 5.30 | 6 |
| South Carolina | 107.15 | 30.57 | 5.47 | 4 |
| South Dakota   | 174.22 | 51.02 | 5.05 | 6 |
| Tennessee      | 120.92 | 35.15 | 5.28 | 4 |
| Texas          | 112.52 | 27.16 | 4.89 | 4 |
| Utah           | 158.19 | 45.53 | 5.28 | 6 |
| Virginia       | 105.40 | 34.97 | 5.61 | 6 |
| Washington     | 97.52  | 32.49 | 5.53 | 6 |
| Wisconsin      | 171.55 | 49.79 | 5.97 | 5 |
| West Virginia  | 123.56 | 38.96 | 5.20 | 6 |
| Wyoming        | 163.12 | 48.39 | 5.34 | 6 |

**Table S10.** Application scenarios of specific countries and regions

| Countries/regions                     | Average ambient temperature in winter/°C | Average ambient temperature in summer/°C | Share of heating days | Target user heating load/W | Target user cooling load/W |
|---------------------------------------|------------------------------------------|------------------------------------------|-----------------------|----------------------------|----------------------------|
| Afghanistan                           | 5.10                                     | 24.32                                    | 0.53                  | 1689.69                    | 231.57                     |
| Albania                               | 8.26                                     | 23.67                                    | 0.72                  | 1374.10                    | 167.09                     |
| Algeria                               | 11.11                                    | 24.13                                    | 0.40                  | 1088.80                    | 213.22                     |
| Argentina                             | 11.72                                    | 23.71                                    | 0.39                  | 1027.58                    | 170.97                     |
| Armenia                               | 3.58                                     | 23.55                                    | 0.85                  | 1842.35                    | 154.89                     |
| Azerbaijan                            | 6.87                                     | 24.49                                    | 0.65                  | 1512.87                    | 249.01                     |
| Bhutan                                | 11.10                                    | 23.28                                    | 0.61                  | 1089.82                    | 128.14                     |
| Bosnia and Herzegovina                | 6.12                                     | 23.40                                    | 0.85                  | 1588.03                    | 139.71                     |
| Bulgaria                              | 5.79                                     | 23.44                                    | 0.79                  | 1620.73                    | 144.11                     |
| Croatia                               | 6.79                                     | 23.48                                    | 0.76                  | 1521.37                    | 148.20                     |
| Cyprus                                | 12.58                                    | 25.84                                    | 0.50                  | 941.79                     | 383.93                     |
| Democratic People's Republic of Korea | 2.50                                     | 23.74                                    | 0.77                  | 1950.50                    | 174.14                     |
| France                                | 8.11                                     | 23.15                                    | 0.78                  | 1388.66                    | 115.08                     |
| Georgia                               | 5.93                                     | 23.35                                    | 0.74                  | 1606.82                    | 134.67                     |
| Greece                                | 10.08                                    | 24.31                                    | 0.60                  | 1191.66                    | 230.58                     |
| Hungary                               | 5.66                                     | 23.82                                    | 0.86                  | 1633.89                    | 182.28                     |
| Iraq                                  | 10.84                                    | 30.69                                    | 0.35                  | 1115.96                    | 868.94                     |
| Islamic Republic of Iran              | 6.12                                     | 24.83                                    | 0.41                  | 1588.36                    | 283.15                     |
| Israel                                | 12.86                                    | 24.58                                    | 0.42                  | 914.16                     | 257.55                     |
| Italy                                 | 8.76                                     | 23.52                                    | 0.64                  | 1324.14                    | 151.66                     |
| Japan                                 | 7.69                                     | 23.56                                    | 0.41                  | 1431.42                    | 156.50                     |
| Jordan                                | 10.69                                    | 24.63                                    | 0.47                  | 1131.10                    | 262.65                     |
| Kazakhstan                            | -0.28                                    | 23.74                                    | 0.66                  | 2228.01                    | 173.56                     |
| Korea                                 | 5.31                                     | 24.16                                    | 0.68                  | 1668.77                    | 215.83                     |
| Kuwait                                | 13.16                                    | 31.60                                    | 0.25                  | 883.63                     | 959.66                     |
| Kyrgyzstan                            | 3.28                                     | 23.55                                    | 0.76                  | 1871.93                    | 155.30                     |
| Lebanon                               | 10.31                                    | 23.81                                    | 0.58                  | 1169.09                    | 181.48                     |
| Malta                                 | 14.00                                    | 24.76                                    | 0.58                  | 799.56                     | 275.52                     |
| Mongolia                              | -3.25                                    | 23.06                                    | 0.74                  | 2525.09                    | 106.29                     |
| Montenegro                            | 6.98                                     | 23.37                                    | 0.80                  | 1502.23                    | 137.46                     |
| Morocco                               | 12.55                                    | 23.93                                    | 0.43                  | 944.95                     | 192.67                     |
| Nepal                                 | 10.93                                    | 23.99                                    | 0.44                  | 1107.36                    | 199.10                     |
| Norfolk Island                        | 15.60                                    | 23.36                                    | 0.36                  | 639.52                     | 136.44                     |
| Peru                                  | 14.87                                    | 23.22                                    | 0.46                  | 713.12                     | 122.42                     |

|                                   |       |       |      |         |        |
|-----------------------------------|-------|-------|------|---------|--------|
| Plurinational State of<br>Bolivia | 12.81 | 23.54 | 0.51 | 918.96  | 153.80 |
| Republic of Moldova               | 4.20  | 23.69 | 0.89 | 1779.84 | 168.72 |
| Republic of North<br>Macedonia    | 5.95  | 23.60 | 0.80 | 1604.61 | 159.86 |
| Romania                           | 4.92  | 23.42 | 0.79 | 1708.45 | 142.29 |
| Serbia                            | 5.89  | 24.05 | 0.84 | 1610.86 | 204.92 |
| Slovenia                          | 6.08  | 23.23 | 0.89 | 1592.15 | 122.52 |
| Spain                             | 10.67 | 23.81 | 0.62 | 1132.53 | 181.18 |
| State of Palestine                | 12.11 | 24.94 | 0.46 | 988.81  | 293.58 |
| Swaziland                         | 13.75 | 23.80 | 0.40 | 825.45  | 179.54 |
| Syrian Arab Republic              | 9.48  | 25.38 | 0.49 | 1251.76 | 337.91 |
| Tajikistan                        | 5.09  | 24.48 | 0.61 | 1691.32 | 248.37 |
| Tunisia                           | 12.31 | 24.80 | 0.44 | 968.74  | 279.67 |
| Turkey                            | 7.25  | 23.77 | 0.60 | 1474.85 | 176.98 |
| Turkmenistan                      | 6.17  | 26.35 | 0.53 | 1582.69 | 435.39 |
| Ukraine                           | 3.45  | 23.29 | 0.80 | 1854.58 | 128.51 |
| Uruguay                           | 12.01 | 23.79 | 0.56 | 998.51  | 178.54 |
| Uzbekistan                        | 5.49  | 25.50 | 0.56 | 1650.58 | 349.67 |

**Table S11.** Application scenarios of specific subnational states/ provinces/ autonomous regions

| Subnational states/provinces/autonomous | Average ambient temperature in winter/°C | Average ambient temperature in summer/°C | Share of heating days | Target user heating load/W | Target user cooling load/W |
|-----------------------------------------|------------------------------------------|------------------------------------------|-----------------------|----------------------------|----------------------------|
| New South Wales                         | 12.44                                    | 23.36                                    | 0.47                  | 955.97                     | 136.11                     |
| South Australia                         | 12.18                                    | 23.52                                    | 0.51                  | 982.28                     | 151.98                     |
| Rio Grande do Sul                       | 12.63                                    | 24.00                                    | 0.39                  | 936.64                     | 199.70                     |
| Ontario                                 | 2.49                                     | 23.41                                    | 0.81                  | 1950.63                    | 140.85                     |
| Anhui                                   | 6.90                                     | 25.69                                    | 0.57                  | 1510.08                    | 369.05                     |
| Beijing                                 | 2.70                                     | 25.72                                    | 0.67                  | 1929.91                    | 372.18                     |
| Chongqing                               | 9.64                                     | 25.61                                    | 0.56                  | 1235.68                    | 361.37                     |
| Fujian                                  | 11.17                                    | 25.50                                    | 0.42                  | 1083.49                    | 350.04                     |
| Gansu                                   | 3.48                                     | 23.14                                    | 0.74                  | 1851.59                    | 113.76                     |
| Guizhou                                 | 8.78                                     | 23.84                                    | 0.56                  | 1321.80                    | 183.69                     |
| Henan                                   | 6.20                                     | 25.55                                    | 0.60                  | 1579.54                    | 355.02                     |
| Hubei                                   | 7.83                                     | 25.83                                    | 0.56                  | 1417.50                    | 382.53                     |
| Hebei                                   | 3.42                                     | 25.17                                    | 0.62                  | 1858.46                    | 316.88                     |
| Heilongjiang                            | -4.10                                    | 23.67                                    | 0.82                  | 2610.03                    | 166.68                     |
| Hunan                                   | 8.69                                     | 26.21                                    | 0.51                  | 1331.48                    | 420.65                     |
| Jilin                                   | -2.06                                    | 23.79                                    | 0.81                  | 2405.73                    | 179.12                     |
| Jiangsu                                 | 6.70                                     | 25.36                                    | 0.59                  | 1530.14                    | 336.05                     |
| Jiangxi                                 | 9.04                                     | 26.50                                    | 0.48                  | 1295.82                    | 450.02                     |
| Liaoning                                | 0.77                                     | 23.99                                    | 0.73                  | 2122.93                    | 198.91                     |
| Nei Mongol                              | -1.62                                    | 23.43                                    | 0.70                  | 2361.81                    | 142.54                     |
| Ningxia Hui                             | 2.65                                     | 23.82                                    | 0.80                  | 1935.21                    | 181.96                     |
| Sichuan                                 | 9.38                                     | 24.74                                    | 0.55                  | 1261.75                    | 273.75                     |
| Shandong                                | 4.95                                     | 24.98                                    | 0.62                  | 1704.65                    | 298.50                     |
| Shanghai                                | 8.08                                     | 26.17                                    | 0.62                  | 1392.38                    | 416.89                     |
| Shaanxi                                 | 5.43                                     | 24.31                                    | 0.66                  | 1657.49                    | 231.35                     |
| Shanxi                                  | 3.04                                     | 23.67                                    | 0.70                  | 1896.17                    | 166.80                     |
| Tianjin                                 | 3.44                                     | 25.59                                    | 0.65                  | 1855.63                    | 358.82                     |
| Xinjiang Uygur                          | 1.25                                     | 24.16                                    | 0.62                  | 2075.15                    | 216.24                     |
| Yunnan                                  | 11.10                                    | 23.12                                    | 0.45                  | 1090.19                    | 112.04                     |
| Zhejiang                                | 8.54                                     | 25.89                                    | 0.55                  | 1345.81                    | 388.55                     |
| Delhi                                   | 13.80                                    | 29.82                                    | 0.23                  | 819.88                     | 781.57                     |
| Himachal Pradesh                        | 9.36                                     | 24.33                                    | 0.52                  | 1263.80                    | 232.69                     |
| Haryana                                 | 13.62                                    | 29.22                                    | 0.24                  | 838.09                     | 721.93                     |
| Punjab                                  | 12.99                                    | 28.72                                    | 0.28                  | 900.75                     | 671.65                     |
| Uttaranchal                             | 11.46                                    | 24.92                                    | 0.41                  | 1053.68                    | 291.94                     |
| Adygey                                  | 5.40                                     | 24.28                                    | 0.83                  | 1660.15                    | 227.55                     |
| Altay                                   | -2.30                                    | 23.57                                    | 0.90                  | 2429.72                    | 157.19                     |

|                 |       |       |      |         |        |
|-----------------|-------|-------|------|---------|--------|
| Astrakhan'      | 2.38  | 25.26 | 0.74 | 1962.43 | 325.87 |
| Chechnya        | 4.57  | 23.86 | 0.76 | 1743.11 | 186.30 |
| Dagestan        | 4.77  | 23.62 | 0.76 | 1723.02 | 161.83 |
| Kabardin-Balkar | 3.97  | 23.42 | 0.85 | 1803.13 | 141.50 |
| Krasnodar       | 5.39  | 24.23 | 0.79 | 1661.08 | 222.59 |
| Kalmyk          | 2.86  | 24.78 | 0.73 | 1913.99 | 277.89 |
| Orenburg        | -1.95 | 24.02 | 0.83 | 2394.77 | 202.02 |
| Rostov          | 2.77  | 24.11 | 0.80 | 1923.47 | 210.52 |
| Samara          | -0.78 | 23.96 | 0.90 | 2278.30 | 196.36 |
| Saratov         | -0.35 | 23.84 | 0.83 | 2235.01 | 183.60 |
| North Ossetia   | 4.45  | 23.25 | 0.86 | 1754.97 | 125.48 |
| Stavropol'      | 4.10  | 23.79 | 0.76 | 1790.22 | 179.31 |
| Volgograd       | 0.86  | 24.48 | 0.80 | 2113.69 | 247.91 |
| Alabama         | 8.95  | 25.23 | 0.49 | 1304.95 | 322.67 |
| Arkansas        | 7.13  | 25.69 | 0.56 | 1486.66 | 368.53 |
| Arizona         | 11.16 | 27.88 | 0.41 | 1084.00 | 588.42 |
| California      | 11.85 | 23.66 | 0.49 | 1014.83 | 165.81 |
| Colorado        | 3.25  | 23.21 | 0.74 | 1875.24 | 121.09 |
| Connecticut     | 4.88  | 24.41 | 0.84 | 1711.80 | 240.95 |
| Delaware        | 6.27  | 25.18 | 0.73 | 1572.70 | 317.72 |
| Georgia         | 8.81  | 24.83 | 0.51 | 1319.13 | 283.11 |
| Iowa            | 2.13  | 24.59 | 0.74 | 1987.11 | 258.85 |
| Idaho           | 4.06  | 23.89 | 0.78 | 1793.79 | 188.59 |
| Illinois        | 3.24  | 24.33 | 0.69 | 1875.63 | 233.22 |
| Indiana         | 3.91  | 24.40 | 0.70 | 1809.10 | 240.05 |
| Kansas          | 4.65  | 25.64 | 0.64 | 1735.31 | 363.97 |
| Kentucky        | 5.78  | 24.69 | 0.65 | 1621.92 | 268.82 |
| Louisiana       | 10.13 | 25.78 | 0.39 | 1187.07 | 377.66 |
| Massachussets   | 4.74  | 24.21 | 0.86 | 1726.20 | 220.92 |
| Maryland        | 5.93  | 24.89 | 0.70 | 1607.18 | 289.37 |
| Michigan        | 2.95  | 23.99 | 0.81 | 1905.15 | 198.88 |
| Minnesota       | 0.36  | 24.20 | 0.82 | 2163.98 | 220.22 |
| Missouri        | 4.87  | 25.17 | 0.64 | 1713.34 | 317.15 |
| Mississippi     | 8.96  | 25.59 | 0.48 | 1303.52 | 359.27 |
| Montana         | 2.50  | 23.45 | 0.83 | 1950.16 | 145.34 |
| North Carolina  | 7.75  | 24.79 | 0.58 | 1424.87 | 279.36 |
| North Dakota    | -0.36 | 24.09 | 0.84 | 2236.05 | 208.81 |
| Nebraska        | 2.80  | 24.98 | 0.71 | 1920.03 | 298.30 |
| New Hampshire   | 3.48  | 24.28 | 0.89 | 1852.19 | 228.22 |
| New Jersey      | 5.40  | 24.66 | 0.75 | 1659.73 | 266.47 |
| New Mexico      | 6.33  | 23.94 | 0.61 | 1567.18 | 193.61 |
| Nevada          | 8.47  | 26.71 | 0.53 | 1353.06 | 471.35 |
| New York        | 4.68  | 24.12 | 0.79 | 1732.12 | 212.00 |

|                |      |       |      |         |        |
|----------------|------|-------|------|---------|--------|
| Ohio           | 4.17 | 24.16 | 0.74 | 1782.71 | 215.54 |
| Oklahoma       | 6.68 | 26.31 | 0.56 | 1531.94 | 431.38 |
| Oregon         | 7.83 | 23.17 | 0.79 | 1416.55 | 117.44 |
| Pennsylvania   | 4.71 | 24.21 | 0.77 | 1728.54 | 220.60 |
| Rhode Island   | 5.05 | 24.79 | 0.87 | 1695.23 | 278.65 |
| South Carolina | 8.94 | 25.22 | 0.53 | 1306.42 | 322.19 |
| South Dakota   | 1.50 | 24.25 | 0.77 | 2050.24 | 225.48 |
| Tennessee      | 7.02 | 24.95 | 0.61 | 1498.32 | 294.61 |
| Texas          | 9.73 | 25.60 | 0.34 | 1227.19 | 359.92 |
| Utah           | 3.10 | 23.54 | 0.69 | 1890.45 | 154.01 |
| Virginia       | 6.63 | 24.81 | 0.65 | 1537.49 | 280.65 |
| Washington     | 7.60 | 23.32 | 0.81 | 1439.85 | 131.70 |
| Wisconsin      | 1.89 | 24.07 | 0.82 | 2010.68 | 207.46 |
| West Virginia  | 5.43 | 23.92 | 0.74 | 1656.68 | 192.15 |
| Wyoming        | 2.18 | 23.46 | 0.82 | 1982.36 | 146.11 |

**Table S12.** Properties of phase change materials in separate heat and cold storage systems

| No. | Materials     | Phase change temperature/°C | Latent heat/J·g <sup>-1</sup> | Thermal conductivity /W·m <sup>-1</sup> ·K <sup>-1</sup> | Specific heat capacity (l) /kJ·kg <sup>-1</sup> ·K <sup>-1</sup> | Specific heat capacity (s) /kJ·kg <sup>-1</sup> ·K <sup>-1</sup> | Density /kg·m <sup>-3</sup> | Cost /\$.kg <sup>-1</sup> | Reference |
|-----|---------------|-----------------------------|-------------------------------|----------------------------------------------------------|------------------------------------------------------------------|------------------------------------------------------------------|-----------------------------|---------------------------|-----------|
| 1   | SA/CSS        | 65.9-66.4                   | 186.1                         | 0.33                                                     | 2.18                                                             | 2.18                                                             | 580                         |                           | 58        |
| 2   | SA            | 67-70.5                     | 174.1-177.6                   | 0.1255-0.1487                                            | 2.48                                                             | 2.48                                                             | 850                         |                           | 58-60     |
| 3   | S72           | 72                          | 155                           | 0.58                                                     | 2.13                                                             | 2.13                                                             | 1666                        | 25.14*                    | 22        |
| 4   | Palmitic acid | 62.5--64                    | 185.4                         | 0.162                                                    | 2.8                                                              | 1.9                                                              | 886                         | 2-150                     | 26,61     |
| 5   | Ice           | 0                           | 210                           | 2                                                        | 4.2                                                              | 2.06                                                             | 992-1000                    |                           |           |

**Table S13.** Time-of-use tariffs of four cities

| Cities    | Electricity price                |                |
|-----------|----------------------------------|----------------|
|           | On-peak price                    | Off-peak price |
| Arkansas  | 19.7 ¢/kWh (From Jun. to Oct.)   | 3.6 ¢/kWh      |
| Beijing   | 1.2930 CNY/kWh                   | 0.2939 CNY/kWh |
| Minnesota | 16.73 ¢/kWh (From Jun. to Sept.) | 7.79 ¢/kWh     |
| Shanghai  | 0.617 CNY/kWh                    | 0.2307 CNY/kWh |

## Reference

1. Gado, M. G. & Hassan, H. Energy-saving potential of compression heat pump using thermal energy storage of phase change materials for cooling and heating applications. *Energy* **263**, 126046 (2023).
2. Tay, N. H. S., Belusko, M. & Bruno, F. An effectiveness-NTU technique for characterising tube-in-tank phase change thermal energy storage systems. *Applied Energy* **91**, 309–319 (2012).
3. Lin, Y., Jia, Y., Alva, G. & Fang, G. Review on thermal conductivity enhancement, thermal properties and applications of phase change materials in thermal energy storage. *Renewable and Sustainable Energy Reviews* **82**, 2730–2742 (2018).
4. Cheng, W., Ding, M., Yuan, X. & Han, B.-C. Analysis of energy saving performance for household refrigerator with thermal storage of condenser and evaporator. *Energy Conversion and Management* **132**, 180–188 (2017).
5. Castell, A. *et al.* Natural convection heat transfer coefficients in phase change material (PCM) modules with external vertical fins. *Applied Thermal Engineering* **28**, 1676–1686 (2008).
6. Bergamini, R., Jensen, J. K. & Elmegaard, B. Thermodynamic competitiveness of high temperature vapor compression heat pumps for boiler substitution. *Energy* **182**, 110–121 (2019).
7. Zhao, B. & Wang, R. Thermal performance investigation of large-scale latent heat storage for heat supply. *Journal of Energy Storage* **56**, 106008 (2022).
8. Liu, Z. & Winterton, R. H. S. A general correlation for saturated and subcooled flow boiling in tubes and annuli, based on a nucleate pool boiling equation. *International Journal of Heat and Mass Transfer* **34**, 2759–2766 (1991).
9. Shah, M. M. A general correlation for heat transfer during film condensation inside pipes. *International Journal of Heat and Mass Transfer* **22**, 547–556 (1979).
10. Dong, Y., Yan, H. & Wang, R. Significant thermal upgrade via cascade high temperature heat pump with low GWP working fluids. *Renewable and Sustainable Energy Reviews* **190**, 114072 (2024).
11. Zhao, B. C., Li, T. X., He, F., Gao, J. C. & Wang, R. Z. Demonstration of  $\text{Mg}(\text{NO}_3)_2 \cdot 6\text{H}_2\text{O}$ -based composite phase change material for practical-scale medium-low temperature thermal energy storage. *Energy* **201**, 117711 (2020).
12. Zhao, B. C. & Wang, R. Z. A novel 3-D model of an industrial-scale tube-fin latent heat storage using salt hydrates with supercooling: A model validation. *Energy* **213**, 118852 (2020).
13. Yu, M., Zhang, C., Fan, Y., Zhang, X. & Zhao, Y. Performance study of phase change charging/discharging processes of condensing heat storage in cold regions based on a mathematical model. *Applied Thermal Engineering* **182**, 115805 (2021).
14. Du, R. Integrated heat pump with phase change materials for space heating. *Renewable and Sustainable Energy Reviews* (2024).
15. Kou, X. & Wang, R. Thermodynamic analysis of electric to thermal heating pathways coupled with thermal energy storage. *Energy* **284**, 129292 (2023).
16. Yang, L. *et al.* Shell-and-Tube Latent Heat Thermal Energy Storage Design Methodology with Material Selection, Storage Performance Evaluation, and Cost Minimization. *Applied Sciences* **11**, 4180 (2021).
17. Shan, L., Martin, A. & Chiu, J. N.-W. Techno-Economic Analysis of Latent Heat Thermal Energy Storage Integrated Heat Pump for Indoor Heating. in *36th International Conference on*

*Efficiency, Cost, Optimization, Simulation and Environmental Impact of Energy Systems (ECOS 2023)* 2265–2276 (ECOS 2023, Las Palmas De Gran Canaria, Spain, 2023). doi:10.52202/069564-0204.

18. Jaric, M., Martic, I., Budimir, N., Svetel, I. & Milanovic, M. Total costs of shell and tube heat exchangers with concentric helical tube coils. *Therm sci* **23**, 3661–3673 (2019).
19. Taal, M. Cost estimation and energy price forecasts for economic evaluation of retrofit projects. *Applied Thermal Engineering* **23**, 1819–1835 (2003).
20. Jiang, J., Hu, B., Ge, T. & Wang, R. Z. Comprehensive selection and assessment methodology of compression heat pump system. *Energy* **241**, 122831 (2022).
21. www.rubitherm.de.
22. epsltd.co.uk.
23. Kulish, V., Aslfattahi, N., Schmirler, M. & Sláma, P. New library of phase-change materials with their selection by the Rényi entropy method. *Sci Rep* **13**, 10446 (2023).
24. Reddy, K. S., Mudgal, V. & Mallick, T. K. Review of latent heat thermal energy storage for improved material stability and effective load management. *Journal of Energy Storage* **15**, 205–227 (2018).
25. Zhang, X. *et al.* Research Progress on the Phase Change Materials for Cold Thermal Energy Storage. *Energies* **14**, 8233 (2021).
26. Hirschey, J., Kumar, N., Turnaoglu, T. & Gluesenkamp, K. R. Review of Low-Cost Organic and Inorganic Phase Change Materials with Phase Change Temperature between 0°C and 65°C. in *International high performance buildings conference* (2021).
27. Faraji, M. Numerical study of the thermal behavior of a novel Composite PCM/concrete wall. *Energy Procedia* **139**, 105–110 (2017).
28. Zalba, B., Marín, J. M., Cabeza, L. F. & Mehling, H. Review on thermal energy storage with phase change: materials, heat transfer analysis and applications. *Applied Thermal Engineering* **23**, 251–283 (2003).
29. Kansara, K., Singh, V. K., Patel, R., Bhavsar, R. R. & Vora, A. P. Numerical investigations of phase change material (PCM) based thermal control module (TCM) under the influence of low gravity environment. *International Journal of Heat and Mass Transfer* **167**, 120811 (2021).
30. De Dios Cruz-Elvira, J. *et al.* A novel dodecanol/tepexil PCM composite for thermal energy storage in buildings. *Materials Chemistry and Physics* **284**, 126067 (2022).
31. Vicente, R. & Silva, T. Brick masonry walls with PCM macrocapsules: An experimental approach. *Applied Thermal Engineering* **67**, 24–34 (2014).
32. Koschenz, M. & Lehmann, B. Development of a thermally activated ceiling panel with PCM for application in lightweight and retrofitted buildings. *Energy and Buildings* **36**, 567–578 (2004).
33. Dixit, P. *et al.* Thermal Buffering Performance of a Propyl Palmitate/Expanded Perlite-Based Form-Stable Composite: Experiment and Numerical Modeling in a Building Model. *Energy Fuels* **35**, 2704–2716 (2021).
34. Biswas, K., Lu, J., Soroushian, P. & Shrestha, S. Combined experimental and numerical evaluation of a prototype nano-PCM enhanced wallboard. *Applied Energy* **131**, 517–529 (2014).
35. Zhao, D. & Tan, G. Numerical analysis of a shell-and-tube latent heat storage unit with fins for air-conditioning application. *Applied Energy* **138**, 381–392 (2015).
36. Li, Y., Zhou, J., Long, E. & Meng, X. Experimental study on thermal performance improvement

- of building envelopes by integrating with phase change material in an intermittently heated room. *Sustainable Cities and Society* **38**, 607–615 (2018).
37. Guldentops, G. & Van Dessel, S. A numerical and experimental study of a cellular passive solar façade system for building thermal control. *Solar Energy* **149**, 102–113 (2017).
  38. Kosny, J., Shukla, N. & Fallahi, A. *Cost Analysis of Simple Phase Change Material-Enhanced Building Envelopes in Southern U.S. Climates*. NREL/SR-5500-55553, DOE/GO-102013-3692, 1067934 <http://www.osti.gov/servlets/purl/1067934/> (2013) doi:10.2172/1067934.
  39. Zhu, N., Hu, N., Hu, P., Lei, F. & Li, S. Experiment study on thermal performance of building integrated with double layers shape-stabilized phase change material wallboard. *Energy* **167**, 1164–1180 (2019).
  40. Iten, M., Liu, S. & Shukla, A. Experimental validation of an air-PCM storage unit comparing the effective heat capacity and enthalpy methods through CFD simulations. *Energy* **155**, 495–503 (2018).
  41. Memarian, S., Kari, B. M., Fayaz, R. & Asadi, S. Single and combined phase change materials: Their effect on seasonal transition period. *Energy and Buildings* **169**, 453–472 (2018).
  42. Wijesuriya, S., Brandt, M. & Tabares-Velasco, P. C. Parametric analysis of a residential building with phase change material (PCM)-enhanced drywall, precooling, and variable electric rates in a hot and dry climate. *Applied Energy* **222**, 497–514 (2018).
  43. Castell, A., Martorell, I., Medrano, M., Pérez, G. & Cabeza, L. F. Experimental study of using PCM in brick constructive solutions for passive cooling. *Energy and Buildings* **42**, 534–540 (2010).
  44. Leang, E., Tittlein, P., Zalewski, L. & Lassue, S. Numerical study of a composite Trombe solar wall integrating microencapsulated PCM. *Energy Procedia* **122**, 1009–1014 (2017).
  45. Kong, X., Lu, S., Huang, J., Cai, Z. & Wei, S. Experimental research on the use of phase change materials in perforated brick rooms for cooling storage. *Energy and Buildings* **62**, 597–604 (2013).
  46. Liu, C., Zhang, G., Arıcı, M., Bian, J. & Li, D. Thermal performance of non-ventilated multilayer glazing facades filled with phase change material. *Solar Energy* **177**, 464–470 (2019).
  47. Huang, M. J., Eames, P. C. & Norton, B. Thermal regulation of building-integrated photovoltaics using phase change materials. *International Journal of Heat and Mass Transfer* **47**, 2715–2733 (2004).
  48. Trp, A., Lenic, K. & Frankovic, B. Analysis of the influence of operating conditions and geometric parameters on heat transfer in water-paraffin shell-and-tube latent thermal energy storage unit. *Applied Thermal Engineering* **26**, 1830–1839 (2006).
  49. Royon, L., Karim, L. & Bontemps, A. Thermal energy storage and release of a new component with PCM for integration in floors for thermal management of buildings. *Energy and Buildings* **63**, 29–35 (2013).
  50. Ansuini, R., Larghetti, R., Giretti, A. & Lemma, M. Radiant floors integrated with PCM for indoor temperature control. *Energy and Buildings* **43**, 3019–3026 (2011).
  51. Rady, M. Thermal performance of packed bed thermal energy storage units using multiple granular phase change composites. *Applied Energy* **86**, 2704–2720 (2009).
  52. Liu, C. *et al.* Numerical analysis on thermal performance of a PCM-filled double glazing roof. *Energy and Buildings* **125**, 267–275 (2016).

53. Kant, K., Shukla, A. & Sharma, A. Heat transfer studies of building brick containing phase change materials. *Solar Energy* **155**, 1233–1242 (2017).
54. Zhou, G. & He, J. Thermal performance of a radiant floor heating system with different heat storage materials and heating pipes. *Applied Energy* **138**, 648–660 (2015).
55. Huang, K., Feng, G. & Zhang, J. Experimental and numerical study on phase change material floor in solar water heating system with a new design. *Solar Energy* **105**, 126–138 (2014).
56. Su, W., Darkwa, J. & Kokogiannakis, G. Review of solid–liquid phase change materials and their encapsulation technologies. *Renewable and Sustainable Energy Reviews* **48**, 373–391 (2015).
57. Agyenim, F., Hewitt, N., Eames, P. & Smyth, M. A review of materials, heat transfer and phase change problem formulation for latent heat thermal energy storage systems (LHTESS). *Renewable and Sustainable Energy Reviews* **14**, 615–628 (2010).
58. Wen, R., Zhang, W., Lv, Z., Huang, Z. & Gao, W. A novel composite Phase change material of Stearic Acid/Carbonized sunflower straw for thermal energy storage. *Materials Letters* **215**, 42–45 (2018).
59. Andiarito, R., Nuryadin, M. K., Taufik, A. & Saleh, R. Better latent heat and specific heat of stearic acid with magnetite/graphene nanocomposite addition for thermal storage application. *IOP Conf. Ser.: Mater. Sci. Eng.* **188**, 012049 (2017).
60. Zhu, C., Chen, Y., Cong, R., Ran, F. & Fang, G. Improved thermal properties of stearic acid/high density polyethylene/carbon fiber composite heat storage materials. *Solar Energy Materials and Solar Cells* **219**, 110782 (2021).
61. Zhou, D., Zhou, Y., Yuan, J. & Liu, Y. Palmitic Acid-Stearic Acid/Expanded Graphite as Form-Stable Composite Phase-Change Material for Latent Heat Thermal Energy Storage. *Journal of Nanomaterials* **2020**, 1–9 (2020).
